## Effects of feeding treatment on growth rates and consequences on performance of primiparous Holstein dairy heifers

Y. Le Cozler<sup>1</sup>, J. Jurquet<sup>2</sup>, N. Bedere<sup>3\*</sup>

<sup>1</sup> PEGASE, INRA, AGROCAMPUS OUEST, 35590, Saint-Gilles, France

<sup>2</sup> Institut de l'Élevage, Monvoisin, 35652 Le Rheu, France

<sup>3</sup> URSE, Ecole Supérieure d'Agricultures, Université de Bretagne Loire, 55 rue Rabelais, Angers, France

\* Current address: PEGASE, INRA, AGROCAMPUS OUEST, 35590, Saint-Gilles, France

Corresponding author: Yannick Le Cozler. Email: [yannick.lecozler@agrocampus-ouest.fr](mailto:yannick.lecozler@agrocampus-ouest.fr)

### Abstract

The objective of this study was to investigate the effects of feeding rearing programs aiming a first calving between 20 and 27 months (mo) of age on growth, reproduction and production performance of Holstein cows at nulliparous and primiparous stages. Our hypothesis was that, in a seasonal autumn calving strategy, it was possible for late-born heifers in the season to catch up with the growth of heifers born earlier and be inseminated at the same time-period, at a 370 kg body weight (BW) minimum. This would result a first calving age at about 21 to 22 mo, without impairing their later performance. To answer this question, an experiment was run, involving a total of 217 heifers over 3 years. These heifers were split into 3 groups: the first group received a control feeding treatment (SD), the second one an intensive-plane diet (ID1) from birth to 6 mo, and the last group an intensive-plane diet until 1 year of age. Groups SD and ID1 comprised heifers born from September until end of November; ID2 was composed of heifers born later. The present study showed that late-born heifers (ID2) could catch up with the growth of the other thanks to feeding treatment, although there were still 42 kg lighter than both SD and ID1 ones at first calving. There was no difference in reproductive performance of the heifers between the groups. Once primiparous, the cows reared with the ID2 treatment tended to produce less milk than SD and ID1 (about -400 kg over the lactation), and there were no difference regarding milk quality, feed intake, body condition score, or BW. A classification on age at first service was created *a posteriori* leading to 3 classes with heifers first inseminated at about 12.5 mo (AFS<sub>12.5</sub>), 14.0 mo (AFS<sub>14.0</sub>), 15.5 mo (AFS<sub>15.5</sub>) of age. Heifers in AFS<sub>12.5</sub> had a faster growth than those in AFS<sub>14.0</sub> and AFS<sub>15.5</sub>. Once primiparous, the AFS<sub>12.5</sub> cows tended to produce less milk at peak than AFS<sub>14.0</sub> and AFS<sub>15.5</sub> (about -1.5 kg/d) although there was no difference regarding total milk production over the lactation. There was no difference between these groups regarding milk quality, feed intake, body condition score, or BW. All these results support the conclusion that it is

37 possible, through feeding treatment, to help late-born heifers to catch up with the growth of other. This  
38 leads to an earlier first calving but do not impair their reproductive and productive performance.

39  
40 **Key words:** dairy cattle, heifer, growth, reproduction, feeding treatment

41  
42 **Implications**

43 Increasing the growth rate of dairy heifers decreased their age at puberty, potentially reducing age at  
44 first calving, and ultimately shortening the non-productive rearing period. Heifers first calving at 22.5  
45 months (mo) of age or less presented similar performances than those calving at 23.8 mo of age or  
46 more.

47  
48 **Introduction**

49 In seasonal calving systems, heifers usually first calve at a young age (around 24 months(mo)) but  
50 1<sup>st</sup> insemination may be delayed for those born at the end of the calving period if an adequate body  
51 weight (BW) is not reached (i.e. 360 to 380 kg for Holstein heifers in French dairy herds; Le Cozler *et*  
52 *al.*, 2008). Increasing the nutrient uptake and thus the growth rate for these late-born heifers is a  
53 solution to lower this risk. A high growth rate during rearing is associated with a decreased age at  
54 puberty and, consequently, 1<sup>st</sup> calving may occur as early as 20 to 21 mo of age. Tozer (2000)  
55 concluded that a higher plane of nutrition incurred higher daily feed costs, but these costs were  
56 recouped when heifers calved at a younger age through savings on labour, housing and overall feed  
57 costs. Regardless of the strategy of rearing (group-calving or not), it is, however, necessary for  
58 animals to have achieved an adequate body size before calving or milk production potential in the  
59 first lactation is compromised (Bach and Ahedo, 2008). Indeed, accelerated growth program for dairy  
60 heifers cannot be resumed to puberty attainment. Many authors have studied the impact of growth  
61 intensity on further performances (see the literature review of Le Cozler *et al.*, 2008), but if most of  
62 them indicated negative impact of too high a growth, some authors indicated limited impact. According  
63 to Pirlo *et al.* (1997), reducing age at first calving to 23 to 24 mo was the most profitable procedure,  
64 but not less than 22 mo (except in cases of low milk prices and high rearing costs). They concluded  
65 that reluctance to decrease age at first calving is generally attributable to the belief that early calving  
66 is detrimental to milk yield and longevity. Here, we designed and led an experiment to determine the  
67 effects of feeding treatments on growth parameters, reproduction and production performance of  
68 Holstein primiparous heifers first calving between 20 and 27 mo of age, in a seasonal calving system.  
69 We hypothesised that genetic improvement over the last decades in dairy production resulted in  
70 animals that could calved now at an earlier age than 24 mo of age and results from autumn groups  
71 calving strategy could be used in a non-grouping strategy. We focused on the possibility for late-born  
72 heifers to catch up with the rest of the heifers at 1<sup>st</sup> artificial insemination (AI) at a minimum BW of  
73 370 to 380 kg, which resulted in an age at first calving lower than 22 mo.

74

## 75 **Material and Methods**

### 76 **General design**

77 A total of 217 Holstein heifers, born during the 2009-10 (n = 65), 2010-11 (n = 73 ) and 2011-12 (n =  
78 76) calving seasons (September to February), were reared and followed until oestrus synchronisation  
79 (12 to 15 mo of age) at the INRA experimental farm of Méjusse (Le Rheu, France). Another  
80 study based on the same experiment was already published, where rearing procedures and strategies  
81 used for the 3 cohorts have been fully detailed for one of them (Abeni *et al.*, 2019). Briefly, calves  
82 born between 1<sup>st</sup> of September and 30<sup>th</sup> of November were alternately allocated to 1 of 2 nutritional  
83 treatments (according to birth order) and fed either a standard diet (SD) or an intensive-plane diet  
84 (ID1) from 0 to 6 mo of age. It was expected that, thanks to the feeding intensity chosen, heifers fed  
85 SD and ID1 diets would reach 190 to 200 and 220 to 230 kg at 6 mo of age, respectively. Heifers born  
86 after 1<sup>st</sup> of December (ID2) received the same intensive-plane diet as ID1 heifers from 0 to 6 mo of  
87 age, to limit the possible confusion effect between age and treatment during this period. Thereafter,  
88 a complementary diet was formulated for ID2 heifers in order to reach 380 kg at 1 year of age. The  
89 main objective of this latest procedure was to study the possibility for late-born heifers to catch up  
90 with the rest of the heifers at 1<sup>st</sup> artificial insemination (AI) at a minimum BW of 370 to 380 kg. It was  
91 expected that this corresponded to average ages of 15 and 12 mo for (SD and ID1) and for (ID2)  
92 heifers, respectively. From end of 1<sup>st</sup> season of grazing, all heifers were grouped-housed until turning  
93 out to pasture season 2. Three weeks before expecting date of calving, heifers entered cows herd  
94 and were fed individually a similar total mixed ration (TMR). During lactation, milk was recorded twice  
95 a day and animals were weighed every day. Experiment ended week 15 after calving.

96

### 97 **Feeding**

98 Diets were formulated for the different stages of growth according to recommendations and  
99 procedures presented by Agabriel and Mechy (2007). They were formulated to reach a targeted  
100 average daily gain (ADG) per period, with respect to the initial BW and feeding treatment used. At the  
101 end of the pre-experimental phase (0-10 d), heifers were group-housed indoors on cumulated straw  
102 bedding. They were fed reconstituted milk replacer made of 135 g milk powder (23.9 % crude protein  
103 and 19.0 % fat content) with 865 g water per litre until weaning (about 77 to 84 d of age). They were  
104 reared in dynamic groups, individually fed with automatic milk feeding systems (AMFS), with free  
105 access to fresh water, straw and hay. Group size varied from 8 to 24 calves per AMFS. Milk was  
106 distributed according to either the standard ration routinely used in the experimental herd

Table 1: Ingredients and chemical composition of the experimental diets

| Item <sup>1</sup>    | TMR1         | TMR2         | TMR3a       | TMR3b       | TMR4          | TMR5          | TMR6          | TMR7          |
|----------------------|--------------|--------------|-------------|-------------|---------------|---------------|---------------|---------------|
| Stage of growth, age | (7d to 4 mo) | (4 to 6/8mo) | (9 to 11mo) | (6 to 11mo) | (11 to 15 mo) | (21 to 26 mo) | (21 to 26 mo) | (21 to 35 mo) |

|                                           |      |      |         |       | (winter<br>1) | (- 21 d<br>prior<br>calving<br>until<br>calving) | Calving<br>+ 14 d | (15 d<br>until end<br>of<br>lactation) |
|-------------------------------------------|------|------|---------|-------|---------------|--------------------------------------------------|-------------------|----------------------------------------|
| Feeding Treatment group                   | All  | All  | SD, ID1 | ID2   | All           | All                                              |                   | All                                    |
| Ingredient, %                             |      |      |         |       |               |                                                  |                   |                                        |
| Corn silage                               | 47.5 | 72.0 | 80.0    | 80.0  | 79.0          | 84.5                                             | 52.5              | 65.0                                   |
| Soybean meal                              | -    | 8.0  | 20.0    | 20.0  | 21.0          | 9.0                                              | 8.0               | 8.0                                    |
| 18% CP alfafa                             | 5    |      |         |       |               |                                                  | 10                | 10                                     |
| pellets                                   |      |      |         |       |               |                                                  |                   |                                        |
| Straw                                     |      |      |         |       |               | 2.5                                              | 2.5               | 2.5                                    |
| Urea                                      |      |      |         |       |               |                                                  |                   | 0.8                                    |
| Minerals + vitamins                       |      |      |         |       |               |                                                  |                   | 1.0                                    |
| Concentrate 1 <sup>2</sup>                | 47.5 | 20.0 |         |       |               |                                                  |                   |                                        |
| Concentrate 2 <sup>3</sup><br>(kg/head/d) |      |      | 1.0     | 2.0   | 1.0           |                                                  |                   |                                        |
| Concentrate 3 <sup>4</sup> (%)            |      |      |         |       |               | 4.0                                              | 25                | 15.0                                   |
| Estimated chemical composition            |      |      |         |       |               |                                                  |                   |                                        |
| DM, %                                     | 51.4 | 42.0 | 42.2    | 46.0  | 42.1          | 38.6                                             | 48.8              | 44.4                                   |
| PDIE, g / kg DM                           | 93.0 | 93.1 | 104.5   | 103.1 | 106.2         | 85.0                                             | 93.7              | 89.6                                   |
| PDIN, g / kg DM                           | 79.8 | 84.0 | 108.7   | 108.5 | 111.3         | 72.8                                             | 83.9              | 91.3                                   |
| UFL / kg DM                               | 0.96 | 0.96 | 0.98    | 1.00  | 0.99          | 0.93                                             | 0.93              | 0.92                                   |

<sup>1</sup> abbreviations: TMR: Total Mixed Ration; SD, ID1, ID2: animals fed either on a standard (SD) or increased-plane (ID1 & ID2) feeding treatment; DM: dry matter; PDIE: metabolizable protein supply; PDIN: rumen-degradable nitrogen; UFL: unit of feed for lactation.

<sup>2</sup> Chemical composition: DM 88.7%; PDIE 118 g; PDIN 114 g; UFL 1.05.

<sup>3</sup> Chemical composition: DM 87.9%; PDIE 81 g; PDIN 90 g; UFL 0.96.

<sup>4</sup> Chemical composition: DM 87.7; PDIE 101 g; PDIN 76 g; UFL 1.05.

107

108 (SD) or an increased 15% milk ration (ID1 & ID2). All calves were fed *ad libitum* total mixed ration 1  
109 (TMR1; Table 1).

110 From weaning to 6-8 mo of age (i.e. turning out to pasture), calves were housed on deep straw  
111 bedding with *ad libitum* access to fresh water and straw. Until 4 mo of age, the SD group received  
112 TMR1 *ad libitum* until the concentrate reached 2 kg DM/head/d. No restriction was applied to ID1 &  
113 ID2 heifers. From 4 to 6-8 mo of age, TMR2 was distributed *ad libitum* until the maximum daily  
114 allowance of concentrate reached 2 kg and 2.5 kg DM/head/d for SD and (ID1 & ID2) heifers,  
115 respectively, i.e. a total daily allowance of 10 and 12.5 kg DM/head/d of TMR2 for SD and (ID1 & ID2)  
116 heifers respectively. These amounts did not change until turning out to pasture.

117 Starting from mid-May and mid-June for (SD & ID1) and ID2 heifers, heifers were turned out to pasture  
118 and rotationally grazed on a perennial ryegrass sward. After a 5-d transition phase and throughout  
119 the pasture season, SD and ID1 groups received a daily supplement of 1 kg DM/heifer of concentrate  
120 2, whereas the ID2 group received 1 kg DM/heifer/d of corn silage and 2 kg DM/heifer/d of concentrate  
121 2. Grass availability and/or quality were insufficient to maintain the desired growth rates during

122 summer. SD and ID1 heifers then received up to 2.5 kg DM/heifer/d of additional TMR3a, plus 1 kg  
123 DM/heifer/d of concentrate 2; ID2 heifers received up to 3 kg DM/heifer/d of TMR3b, plus 2 kg  
124 DM/heifer/d of concentrate 2. To achieve 380 kg at the end of outdoor season (when oestrus  
125 synchronisation started), the expected ADG for SD and ID1 heifers was estimated to be around 600  
126 g/d during this period, with a feeding regime based on pasture plus 1 kg DM/heifer/d of concentrate  
127 2, and 800 g/d when receiving grass plus TMR3a. For ID2 heifers, it was estimated that grass alone  
128 was not sufficient to reach 900 g/d during the same period and TMR3b was used (Table 1). In the  
129 pasture area, a permanent headlock barrier (80 places on concrete floor) was used daily to feed SD  
130 and ID1 heifers with their concentrate. Heifers were locked for 1 hour while eating, to limit competition  
131 on feed intake between heifers. The SD2 group had free access to its ration, and so, heifers were not  
132 locked.

133 At the end of the first pasture season (1<sup>st</sup> week of November), heifers were group-housed (8  
134 heifers/pen) on deep straw bedding and received 3.8 kg DM/head/d of a diet containing 79% corn  
135 silage and 21% soybean meal. They had free access to fresh water, straw and mineral complements.  
136 After a 2-week adaptation period, oestrous cycles were synchronised in heifers (see below), and the  
137 same procedure of rearing was applied for all heifers. Depending on their date of successful  
138 insemination, heifers turned out to pasture (generally in March). They were then all reared in an  
139 unique group and received no additional feed but grass, except a mineral and vitamins  
140 complementation.

141 Three weeks before the expected date of calving, all heifers were housed indoors, together with  
142 multiparous cows, in a cubicle barn with fresh straw bedding distributed daily. Heifers were fed  
143 individually and received a daily TMR5 composed of corn silage (84.5 %), soybean meal (9 %),  
144 concentrate (4 %) and straw.

145 From calving to 14 d post-calving, TMR6 was composed of corn silage (52.5 %), soya bean meal (8  
146 %), concentrate (25 %), dehydrated lucerne (1 %), mineral/vitamin complement (150 g, with 7% P,  
147 22% Ca and 4% Mg), urea and straw (Table 1).

148 From day 14 after calving, cows individually received TMR7, composed of corn silage (65 %), soybean  
149 meal (8 %), concentrate (15 %), dehydrated lucerne (1 %), urea and completed with mineral/vitamin  
150 complement (7% P; 22% Ca and 4% Mg). During lactation, all heifers were fed *ad libitum*, based on  
151 a 10% refusal at least per day. Feed was distributed twice a day (09.00 and 16.30), and refusals  
152 collected every morning, before distribution of fresh TMR.

153 During the entire experiment, all heifers and cows housed indoor had free access to fresh water.

#### 154 **Age at first service**

155 A classification on age at first service (AFS) was created *a posteriori* in order to better understand  
156 which factors are leading to different AFS and how future performance can be related to AFS.

157 Three classes were made so that the number of animal in each of them is balanced (Table 2).

Table 2: Description of the classes of age at first service

|                  | AFS <sub>12.5</sub> | AFS <sub>14.0</sub> | AFS <sub>15.5</sub> |
|------------------|---------------------|---------------------|---------------------|
| AFS <sup>1</sup> | 12.6 (0.73)         | 14.2 (0.36)         | 15.4 (0.65)         |
| Total number     | 58                  | 57                  | 60                  |
| Number in SD     | 16                  | 29                  | 29                  |
| Number in ID1    | 15                  | 27                  | 30                  |
| Number in ID2    | 27                  | 1                   | 1                   |

<sup>1</sup>Mean age at first calving with standard deviations in parentheses

158

## 159 **Oestrus synchronisation**

160 All heifers were inseminated after oestrus synchronization during winter 2 of rearing, so that calving  
161 should occur at around two years of age. At the end of November, for nearly half of the heifers, oestrus  
162 was synchronized using a progestin ear implant (Norgestomet®, Intervet, Angers, France) in  
163 conjunction with an intramuscular oestrogen injection (Crestar®, Intervet, Angers, France) without  
164 consideration of ovarian activity. A second synchronization was performed three weeks later for the  
165 rest of the heifers. After nine days of treatment, the ear implant was removed. Heifers generally  
166 exhibited signs of oestrus within 24 to 96 h and were then inseminated on detected oestrus. In case  
167 of failure to conceive, heifers exhibiting further signs of oestrus were inseminated until the end of the  
168 reproductive season (April). Ultrasonography was conducted 42 d after insemination on average in  
169 order to diagnose pregnancy. Non-gestating heifers were then removed from the rest of the  
170 experiment.

171

## 172 **Measurements and registration**

173 Heifers were weighed every 14 d from birth to weaning, every 21 d from weaning until turning out to  
174 pasture, and every 28 d until the end of the experiment. Interpolations were performed in order to  
175 compare BW of heifers at similar stage of growth. Average daily gains were then calculated. Heifer  
176 health and care information was recorded during the experiment. Their body condition score (BCS)  
177 was recorded 3 weeks before the expected date of calving and then, once a month. The method and  
178 scale developed by Bazin *et al.* (1984) that ranged from 0 to 5, was used. BCS was scored by 3  
179 trained technicians and their records were averaged.

180 To monitor morphological traits during rearing and first lactation, five measurements were recorded:  
181 heart girth (HG), chest depth (CD), wither height (WH), hip width (HW) and backside width (BaW). A  
182 tape measure was used to measure HG, while a height gauge was used for the other measurements.  
183 These measurements were recorded only for the 2 firsts cohorts (2009-10 and 2010-11), results are  
184 presented on complementary data 1 and figures 1 & 2. Presentations are based on a classification  
185 on age at first service (AFC), created *a posteriori* (not presented and discussed in present paper).

186 Daily feed intake was calculated individually as the difference between daily feed allowance and  
187 refusals. Refusals were collected every day at 7.00 and weighed. The composition of refusal and  
188 allowance were presumed to be the same. Dry matter (DM) for silage was determined 5 times per

189 week, while DM of the pellets was determined once a week. Feed composition was estimated based  
190 on average samples for corn silage, straw, soybean, and concentrate. No such information was  
191 available for fresh grass (see Table 1).

192

### 193 ***Milk content analysis***

194 Milk production was automatically recorded at each milking (i.e. twice daily). During 6 successive  
195 milkings (Tuesday to Thursday), milk samples were collected and analysed from each cow, to  
196 determine fat and protein contents (Milkoscan, Foss Electric, DK-3400 Hillerod, Denmark).

197

### 198 ***Milk progesterone analysis***

199 From calving to either 2 weeks after the service inducing pregnancy or to 5 weeks after the end of the  
200 breeding season (i.e. July), morning milk samples were collected on Monday, Wednesday and Friday,  
201 and stored at -20°C for progesterone determination by commercial ELISA kits (Milk Progesterone  
202 ELISA, Ridgeway Science Ltd., England). The coefficients of variation between assays for ELISA on  
203 5 ng/ml control samples ranged between 8 % and 14 % among experimental years.

204

### 205 ***Determination of Luteal Activity***

206 Two progesterone (P4) milk concentration thresholds were defined as in Petersson *et al.* (2006)  
207 adapted by Cutullic *et al.* (2011) to distinguish (i) the baseline P4 level in milk from the luteal phase  
208 level (threshold 1) and (ii) a low luteal phase level from a high luteal phase level (threshold 2). P4  
209 values were qualified as follows: negative (< threshold 1), positive (> threshold 2) and intermediate.  
210 In short, rises of P4 milk concentrations were considered to be induced by corpus luteum activity if at  
211 least 2 consecutive values were not negative and at least one positive. Drops in P4 milk  
212 concentrations were considered to result from luteolysis of the corpus luteum when at least 1 value  
213 became negative. These definitions enabled to identify and distinguish luteal phases from inter-luteal  
214 phases.

215

### 216 ***Qualification of Progesterone Profiles***

217 For each luteal phase, physiological intervals were computed: commencement of luteal activity (CLA),  
218 cycle length (IOI), luteal phase length (LUT) and inter-luteal interval (ILI; for details, see Cutullic *et al.*,  
219 2011). Ovulation was considered to induce a prolonged luteal phase (PLP) if the luteal phase lasted  
220 longer than 25 days. Ovulation was considered to be delayed if inter luteal interval is longer than 12  
221 days. Based on these definitions, P4 profiles were classified as (i) normal, (ii) PLP profile (if at least  
222 one PLP was observed), (iii) delayed (D; if CLA > 60 days), (iv) interrupted (I; if at least one ovulation  
223 of rank > 2 was delayed) or (v) disordered (Z; if luteal activity appeared irregular but could not be  
224 included in any abnormality class).

225

## 226 **Calculations and statistical analysis**

227 All data handling and statistical analyses were performed in R using either the *lm* procedure for  
228 ANOVA or the *glm* for logistic regressions (R Core Team, 2019). Quantitative traits (i.e. growth, ages,  
229 live weight, milk production, body condition score, CLA and cycle lengths) were studied using the  
230 following ANOVA model :

$$231 \quad y_{ij} = \mu + year_i + \left| \begin{matrix} AFS_j \\ T_j \end{matrix} \right| + e_{ij}$$

232 where  $y_{ij}$  is the variable of interest,  $\mu$  was the mean of the variable of interest,  $year_i$  was the fixed  
233 effect of the experimental year ( $i=1, 2$  or  $3$ ), either  $AFS_j$  that was the fixed effect of age at first service  
234 ( $j= 12.5, 14.0$  or  $15.5$  mo) or  $T_j$  that was the fixed effect of the feeding treatment ( $j= SD, ID1$  or  $ID2$ )  
235 was included in the model,  $e_{ij}$  was the random residual effect.

236 Dichotomous traits (i.e. reproductive success and type of cyclicity pattern) were studied using the  
237 following logistic regression model :

$$238 \quad \log \left[ \frac{P(y_{ij} = 1)}{1 - P(y_{ij} = 1)} \right] = \mu + year_i + \left| \begin{matrix} AFS_j \\ T_j \end{matrix} \right| + \beta \times PRI_{ij}$$

239 where  $y_{ij}$  is the variable of interest,  $\mu$  is the mean and the fixed effects  $year_i$ ,  $AFS_j$  or  $T_j$  are the same  
240 as described above. In the case of reproductive performance of heifers, the covariate  $PRI_{ij}$  that  
241 describes the effect of the interval from the removal of the last progesterone-releasing implant to the  
242 insemination was included. This covariate was not needed for performance of cows because only  
243 heifers are synchronized.

244 Effects were declared highly significant at  $P<0.001$ , significant at  $P<0.05$  and as a trend at  $P<0.10$ .

245

## 246 **Results**

247 There were initially 217 heifers enrolled in the experiment, out of which 175 successfully calved. The  
248 42 remaining animal either died during rearing (7), were culled because of injuries (6), or were not  
249 pregnant within the breeding period considered for the present study (29).

250

### 251 **Growth and reproductive performance of heifers**

252 The average BW at birth was 41 kg ( $\pm 5.2$ ) and was balanced across the groups (i.e. not associated  
253 to neither feeding treatment nor AFS).



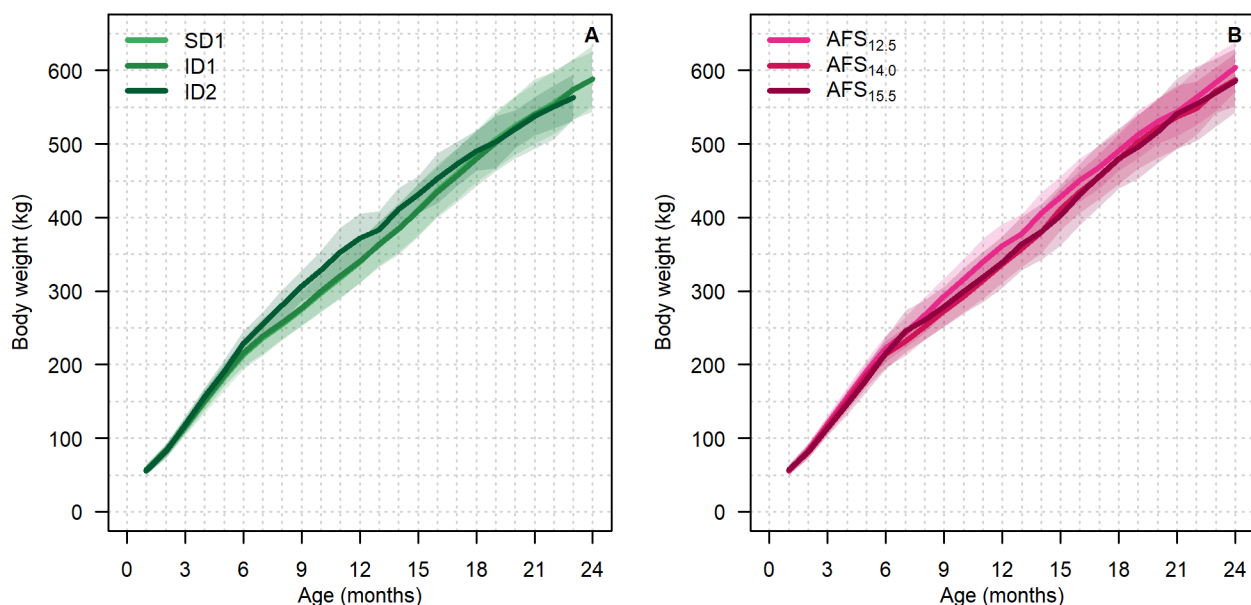

254

255

Figure 1: Body weight of the heifers during the rearing period, according to the feeding treatment (A) and classes

256

of age at first service (AFS; B).

257

258 Feeding treatment had limited effect on growth during milking phase and heifers reached 117 kg

259 ( $\pm 11.8$ ) at 3 mo of age (just after weaning). From weaning to 6 mo of age, heifers in the ID2 group

260 were heavier than these in both the SD and ID1 treatments (229 kg vs 213 kg and 217 kg at 6 mo of

261 age respectively;  $P < 0.001$ ; Figure 1.A). The highest ADG was found for ID2 heifers from 0 to 6 mo

262 (1046 vs 958 and 976 g/d for ID2, SD and ID1 respectively;  $P < 0.001$ ). This difference was still

263 significant from 6 to 12 mo of age (789, 703 and 699 g/d for ID2, SD and ID1 heifers, respectively).

264 However, from 12 to 18 mo of age, ADG was significantly reduced for ID2 heifers in comparison of

265 SD and ID1 heifers (660 vs 800 and 774 g/d respectively).

266 Reproductive performance was not affected by the feeding treatment (Table 3), although the number

267 of service tended to be lower for ID2 heifers than for SD and ID1 heifers (1.5 vs 1.9 and 1.8,

268 respectively). Indeed, cows in the 3 feeding treatment showed a similar interval from the start of the

269 breeding season to the 1<sup>st</sup> service (13.5 d), similar success at 1<sup>st</sup> service (about 62% of pregnant

270 heifers) and similar pregnancy rate by the end of the breeding season (94%).

271 There was no difference in calf BW (37.9 kg) despite a difference in their dam's BW at both 1<sup>st</sup> service

272 and 1<sup>st</sup> calving (ID2 heifers were lighter than both SD and ID1, Table 3 and Table 5). Heifers in the

273 ID2 treatment calved at a younger age than those in the SD and ID1 treatments (about 2 months

274 earlier,  $P < 0.001$ ; Table 3).

275 Heifers inseminated at a young age (12.5 mo of age on average; AFS<sub>12.5</sub>) tended to have a higher

276 growth rate than heifers inseminated at either 14.0 (AFS<sub>14.0</sub>) or 15.5 (AFS<sub>15.5</sub>) mo of age, from 0 to 6

277 mo of age (1001 vs 960 and 978 g/d;  $P < 0.10$ ; Table 4). This difference became more important

278 from 6 to 12 mo of age (759 vs 688 and 698 for AFS<sub>12.5</sub>, AFS<sub>14.0</sub> and AFS<sub>15.5</sub> respectively;  $P < 0.01$

Table 3: Effect of the feeding treatment on the growth and reproductive performance of heifers during the rearing period

|                                                      | Feeding Treatment  |                    |                    | Model <sup>1</sup>            |       | Significance levels <sup>2</sup> |
|------------------------------------------------------|--------------------|--------------------|--------------------|-------------------------------|-------|----------------------------------|
|                                                      | SD1                | ID1                | ID2                | R <sup>2</sup> <sub>adj</sub> | RSE   |                                  |
| Number of records                                    | 74                 | 72                 | 29                 |                               |       |                                  |
| <b>Growth</b>                                        |                    |                    |                    |                               |       |                                  |
| BW at birth (kg)                                     | 41.2               | 41.7               | 41.1               | 0.00                          | 5.19  | 0.85                             |
| BW at 1st AI (kg)                                    | 400.7 <sup>a</sup> | 398.5 <sup>a</sup> | 378.1 <sup>b</sup> | 0.14                          | 33.29 | ★★                               |
| ADG 0-6 months (g/d)                                 | 958 <sup>a</sup>   | 976 <sup>a</sup>   | 1042 <sup>b</sup>  | 0.09                          | 97.7  | ★★★                              |
| ADG 6-12 months (g/d)                                | 703 <sup>a</sup>   | 699 <sup>a</sup>   | 789 <sup>b</sup>   | 0.31                          | 116.8 | ★★                               |
| ADG 12-18 months (g/d)                               | 800 <sup>a</sup>   | 774 <sup>a</sup>   | 660 <sup>b</sup>   | 0.11                          | 133.2 | ★★★                              |
| <b>Reproduction</b>                                  |                    |                    |                    |                               |       |                                  |
| Start of breeding season to 1st service interval (d) | 13.9               | 12.8               | 14.0               | 0.00                          | 5.76  | 0.46                             |
| Success at 1st service (%)                           | 64                 | 58                 | 66                 | NA                            | NA    | 0.64                             |
| Number of service                                    | 1.9                | 1.8                | 1.5                | 0.21                          | 0.78  | ●                                |
| Pregnant (%)                                         | 95                 | 96                 | 90                 | NA                            | NA    | 0.67                             |
| Age at 1st calving (months)                          | 24.0 <sup>a</sup>  | 23.9 <sup>a</sup>  | 21.9 <sup>b</sup>  | 0.32                          | 1.26  | ★★★                              |
| Calf body weight (kg)                                | 38.4               | 37.6               | 37.2               | 0.32                          | 4.02  | 0.37                             |

<sup>1</sup>adjusted coefficient of determination: R<sup>2</sup><sub>adj</sub>; and residual standard error: RSE.

<sup>2</sup>★★★ P<0.001; ★★ P<0.01; ★ P<0.05; ● P<0.1; the exact P-value otherwise

<sup>a-b</sup> Different superscripts point out adjusted means that are different between feeding treatments (P<0.05, Tukey's pairwise comparison)

279

Table 4: Effect of the feeding treatment on the growth and reproductive performance of heifers during the rearing period

|                                                      | Age at first service (AFS) |                     |                     | Model <sup>1</sup>            |       | Significance levels <sup>2</sup> |
|------------------------------------------------------|----------------------------|---------------------|---------------------|-------------------------------|-------|----------------------------------|
|                                                      | AFS <sub>12.5</sub>        | AFS <sub>14.0</sub> | AFS <sub>15.5</sub> | R <sup>2</sup> <sub>adj</sub> | RSE   |                                  |
| Number of records                                    | 58                         | 57                  | 60                  |                               |       |                                  |
| <b>Growth</b>                                        |                            |                     |                     |                               |       |                                  |
| BW at birth (kg)                                     | 41.5                       | 42.0                | 40.2                | 0.02                          | 5.13  | 0.15                             |
| BW at 1st AI (kg)                                    | 373.1 <sup>a</sup>         | 394.3 <sup>b</sup>  | 419.8 <sup>c</sup>  | 0.37                          | 28.49 | ★★★                              |
| ADG 0-6 months (g/d)                                 | 1001                       | 960                 | 978                 | 0.03                          | 100.8 | ●                                |
| ADG 6-12 months (g/d)                                | 759 <sup>a</sup>           | 688 <sup>b</sup>    | 698 <sup>b</sup>    | 0.30                          | 117.5 | ★★                               |
| ADG 12-18 months (g/d)                               | 712 <sup>a</sup>           | 799 <sup>b</sup>    | 790 <sup>b</sup>    | 0.07                          | 136.3 | ★★                               |
| <b>Fertility</b>                                     |                            |                     |                     |                               |       |                                  |
| Start of breeding season to 1st service interval (d) | 12.9                       | 13.2                | 14.3                | 0.00                          | 5.75  | 0.42                             |
| Success at 1st service (%)                           | 59                         | 60                  | 67                  | NA                            | NA    | 0.30                             |
| Number of service                                    | 1.7                        | 1.7                 | 1.9                 | 0.20                          | 0.78  | 0.25                             |
| Pregnant (%)                                         | 93                         | 91                  | 98                  | NA                            | NA    | 0.37                             |
| Age at 1st calving (months)                          | 22.3 <sup>a</sup>          | 23.8 <sup>b</sup>   | 24.8 <sup>c</sup>   | 0.52                          | 1.06  | ★★★                              |
| Calf body weight (kg)                                | 37.4                       | 38.6                | 37.7                | 0.32                          | 4.02  | 0.31                             |

<sup>1</sup>adjusted coefficient of determination: R<sup>2</sup><sub>adj</sub>; and residual standard error: RSE.

<sup>2</sup>★★★ P<0.001; ★★ P<0.01; ★ P<0.05; ● P<0.1; the exact P-value otherwise

<sup>a-b</sup> Different superscripts point out adjusted means that are different between feeding treatments (P<0.05, Tukey's pairwise comparison)

280 Table 4; Figure 1.B). Growth was reduced for AFS<sub>12.5</sub> animals from 12 to 18 mo of age, with an ADG  
281 of 712 g/d, compared to 799 and 790 g/d for AFS<sub>14.0</sub> and AFS<sub>15.5</sub> (P < 0.001; Table 4). This is  
282 consistent with the effects of feeding treatment observed, and with the distribution of animals among  
283 the classes of AFS and feeding treatments (Table 2).

284 Fertility was not affected by age at first service (Table 4): all heifers showed a similar interval from the  
285 start of the breeding season to the 1<sup>st</sup> service, a similar success rate at 1<sup>st</sup> service and pregnancy rate  
286 by the end of the breeding season, with a similar number of service per animal.

287 There was no difference in calf BW (37.9 kg) despite a difference in their dam's BW at 1<sup>st</sup> service and  
288 at 1<sup>st</sup> calving (AFS<sub>12.5</sub> heifers were lighter than the ones in AFS<sub>14.0</sub> themselves lighter than the one in  
289 AFS<sub>15.5</sub>, Table 4 and Table 6). Consistent with the age at 1<sup>st</sup> service, heifers in the AFS<sub>12.5</sub> group  
290 calved younger than those in the AFS<sub>14.0</sub> who calved at a younger age than those in the AFS<sub>15.5</sub> group  
291 (Table 4).

292

### 293 ***Lactating performance of primiparous cows***

294 BW recorded immediately after calving was lower for ID2 cows compared to SD and ID1 cows (501  
295 vs 542 and 534 kg; P < 0.001; Table 5; Figure 2.A.), which is consistent with the fact that ID2 heifers  
296 first calved at a younger age than SD and ID1 heifers (Table 4). No difference between the feeding  
297 treatments was noticed in BCS during the first lactation. On a 308 d basis, ID2 cows tended to produce  
298 less milk than SD and ID1 cows (6920 vs 7312 and 7370 kg; P < 0.10; Table 5; Figure 2.C.). There  
299 was no difference between feeding treatments regarding average fat and protein contents. Milk yield  
300 peak was reduced for ID2 cows compared to both SD and ID1 ones (28.7 vs 31.3 and 31.9 kg; P <  
301 0.001). During the first 7 weeks of lactation, ID2 cows were lighter (on average -38 kg compared to  
302 SD and -25 kg compared to ID1); and produced less milk (-3.1 kg/d compared to both SD and ID1).  
303 This difference was already shrunk during the last part of the period (from 8 to 15 weeks), ID2 cows  
304 weighed 27 kg and 17 kg less than SD and HD1 cows respectively; and produced 2.2 kg/d and 2.9  
305 kg/d of milk less than SD and HD1 cows respectively.

306 The feeding treatment of dairy cows during the rearing period did not affect ovarian cyclicity during  
307 the 1<sup>st</sup> lactation (Table 5). On average, the CLA was about 20.4 d, the first IOI was about 20.7 d with  
308 no difference among treatments concerning the LUT and the ILI. There was no difference concerning  
309 the subsequent cycles neither, with an IOI of 23.3 d on average. The distribution of abnormal pattern  
310 of ovarian activity was not significant, although the ID2 cows showed a lower proportion of normal  
311 profile than ID1 cows, that had themselves a lower proportion of normal profiles than SD cows (53%  
312 vs 59% vs 65% respectively; Table 5). ID2 cows had an incidence of 33% of PLP abnormalities, while  
313 the incidence in ID1 and SD cows were 18 and 19% respectively (Table 5). About 86% of the cows  
314 were pregnant at the end of the breeding season, with no relationship with feeding treatment. Although  
315 the difference in cyclicity between feeding treatment did not impair the re-calving rate, ID1 cows

316 needed more inseminations to be pregnant than SD cows (2.4 vs 1.9;  $P < 0.05$ ; Table 5). The number  
317 of services needed to achieve pregnancy was about 2.2 for the ID2 cows. Subsequent calf BW was  
318 not affected by the feeding treatment.  
319

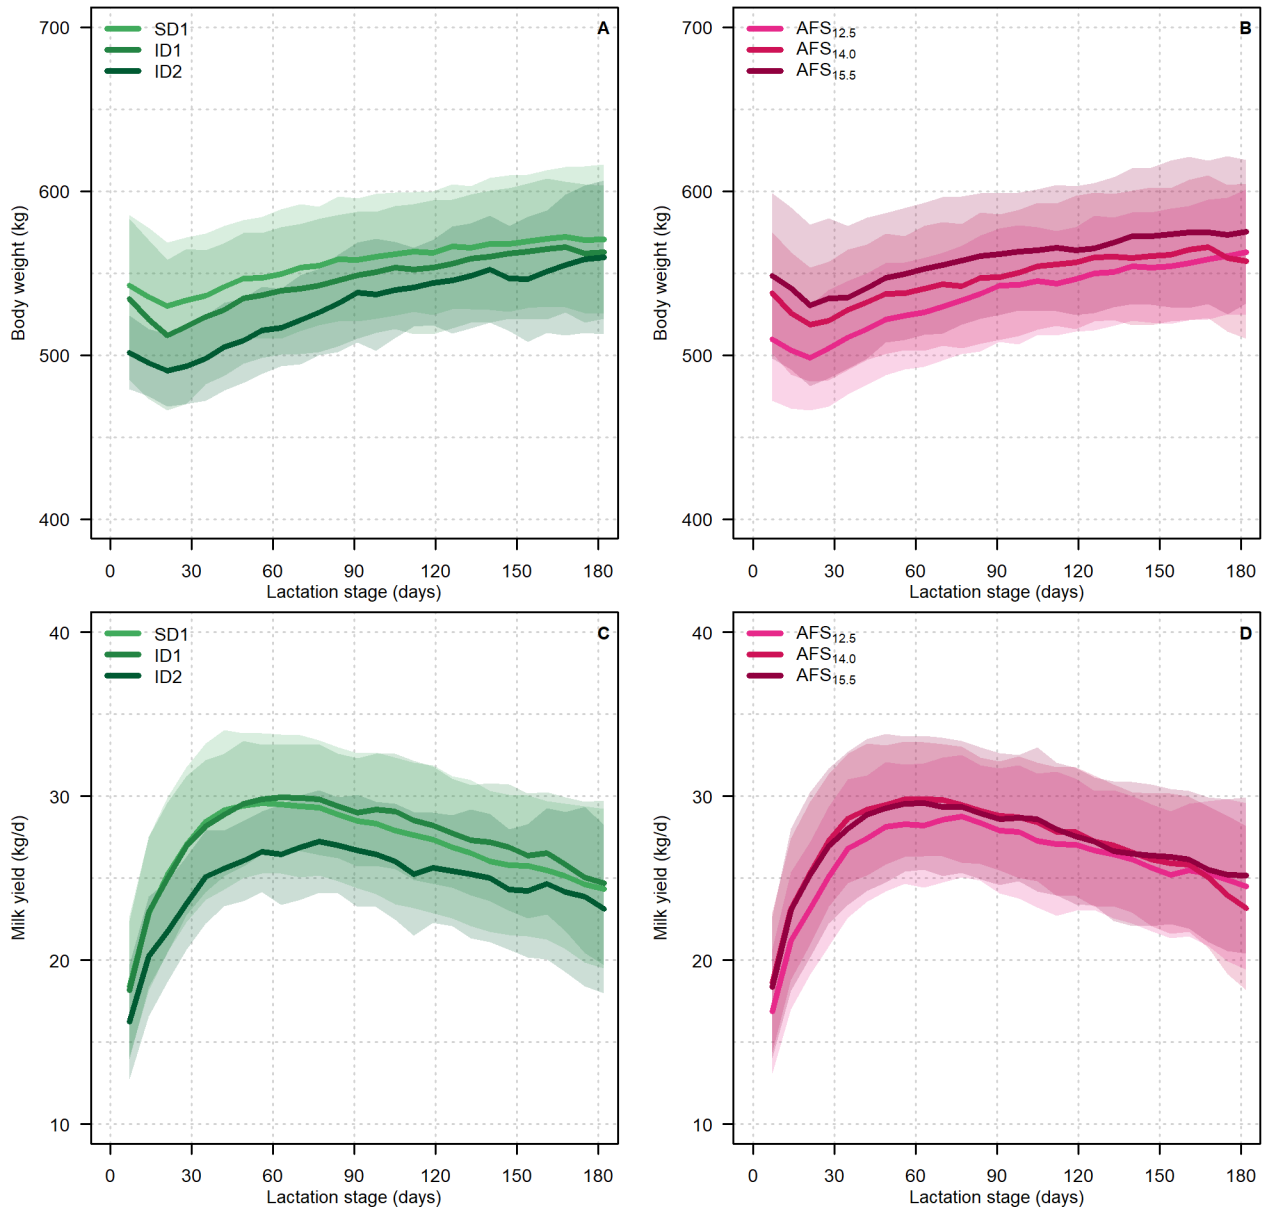

320  
321 Figure 2: Body weight of the primiparous cows during lactation, according to the feeding treatment (A) and  
322 classes of age at first service (B); and milk yield of the primiparous cows during lactation, according to the  
323 feeding treatment (C) and classes of age at first service (D).  
324

325 BW at calving was affected by AFS and was lower for AFS<sub>12.5</sub> than for AFS<sub>14.0</sub> and for AFS<sub>15.5</sub> cows  
326 (509 kg vs 539 kg and 549 kg respectively,  $P < 0.001$ ; Table 6; Figure 2.B.). BCS at calving was  
327 significantly higher for AFS<sub>15.5</sub> heifers in comparison of BCS of AFS<sub>12.5</sub>, AFS<sub>14.0</sub> (2.45 vs 2.35,  
328 respectively;  $P < 0.05$ ). After calving, BCS did not differ between groups of heifers. On a 308 d basis,  
329 there was no difference in milk yield or composition. Only milk yield pic tended to be reduced for

330 AFS<sub>12.5</sub> (30.2 kg), in comparison of milk yield of AFS<sub>14.0</sub> and AFS<sub>15.5</sub> (31.6 and 31.7 respectively; Figure  
 331 2.D.; Table 6).  
 332

Table 6: Effect of the class of age at first calving on the productive and reproductive performance of primiparous cows

|                                  | Age at first service (AFS) |                     |                     | Model <sup>1</sup>            |       | Significance levels <sup>2</sup> |
|----------------------------------|----------------------------|---------------------|---------------------|-------------------------------|-------|----------------------------------|
|                                  | AFS <sub>12.5</sub>        | AFS <sub>14.0</sub> | AFS <sub>15.5</sub> | R <sup>2</sup> <sub>adj</sub> | RSE   |                                  |
| Number of records                | 51                         | 50                  | 58                  |                               |       |                                  |
| Production                       |                            |                     |                     |                               |       |                                  |
| Total milk yield over 308 d (kg) | 7229                       | 7236                | 7370                | 0.15                          | 721.7 | 0.68                             |
| Peak milk yield (kg)             | 30.2                       | 31.6                | 31.7                | 0.04                          | 3.59  | ●                                |
| Average Fat Content (g/kg)       | 36.2                       | 36.9                | 36.8                | 0.10                          | 3.65  | 0.66                             |
| Average Protein Content (g/kg)   | 29.8                       | 29.9                | 29.9                | 0.00                          | 1.56  | 0.93                             |
| Conformation                     |                            |                     |                     |                               |       |                                  |
| BW at 1st calving (kg)           | 509a                       | 539b                | 549b                | 0.14                          | 41.9  | ★★★                              |
| BCS at calving (0-5 scale)       | 2.35a                      | 2.35a               | 2.45b               | 0.34                          | 0.295 | 0.05                             |
| BCS at nadir (0-5 scale)         | 1.75                       | 1.8                 | 1.85                | 0.44                          | 0.264 | 0.13                             |
| BCS loss to nadir (0-5 scale)    | -0.60                      | -0.60               | -0.55               | 0.44                          | 0.254 | 0.41                             |
| Cyclicity                        |                            |                     |                     |                               |       |                                  |
| CLA (d)                          | 20.2                       | 23.6                | 23.7                | 0.00                          | 0.56  | 0.39                             |
| IOI <sub>1</sub>                 | 25.0                       | 19.8                | 23.2                | 0.04                          | 13.96 | 0.31                             |
| LUT <sub>1</sub>                 | 13.9                       | 12.3                | 14.9                | 0.19                          | 10.73 | 0.57                             |
| ILI <sub>1</sub>                 | 10.7                       | 8.7                 | 10.7                | 0.04                          | 11.32 | 0.68                             |
| IOI <sub>2-4</sub>               | 23.0                       | 22.3                | 24.1                | 0.00                          | 5.92  | 0.45                             |
| LUT <sub>2-4</sub>               | 14.5                       | 13.6                | 12.7                | 0.39                          | 5.75  | 0.44                             |
| ILI <sub>2-4</sub>               | 8.8                        | 8.8                 | 11.1                | 0.48                          | 4.67  | ●                                |
| Normal (%)                       | 58%                        | 68%                 | 56%                 | NA                            | NA    | 0.55                             |
| PLP (%)                          | 29%                        | 8%                  | 23%                 | NA                            | NA    | ★                                |
| Delayed (%)                      | 5%                         | 13%                 | 14%                 | NA                            | NA    | 0.23                             |
| Fertility                        |                            |                     |                     |                               |       |                                  |
| Number of service per cow        | 1.9                        | 2.4                 | 2.2                 | 0.08                          | 1.28  | 0.16                             |
| Pregnant (%)                     | 86%                        | 88%                 | 84%                 | NA                            | NA    | 0.90                             |
| Calf body weight (kg)            | 37.2a                      | 39.3b               | 37.3a               | 0.04                          | 4.77  | ★                                |

<sup>1</sup>adjusted coefficient of determination: R<sup>2</sup><sub>adj</sub>; and residual standard error: RSE.

<sup>2</sup>★★★ P<0.001; ★★ P<0.01; ★ P<0.05; ● P<0.1; the exact P-value otherwise

<sup>a-b</sup> Different superscripts point out adjusted means that are different between feeding treatments (P<0.05, Tukey's pairwise comparison)

333  
 334 Fertility of cows was very little affected by AFS. Concerning ovarian cyclicity, all 3 groups of AFS  
 335 showed a similar CLA, with similar cycles length, except for cows in AFS<sub>15.5</sub> that tended to show longer  
 336 ILI between the 2<sup>nd</sup> to 4<sup>th</sup> cycle, than cows in AFS<sub>12.5</sub> and AFS<sub>14.0</sub> (Table 6) Cows in the AFS<sub>14.0</sub> group  
 337 showed a lower incidence of PLP than cows in AFS<sub>12.5</sub> and AFS<sub>15.5</sub> (8% vs 29% and 23% respectively;  
 338 P < 0.05; Table 6). Fertility was not affected by AFS neither: all groups showed a similar number of  
 339 inseminations (2.2 on average) and 86% of the cows were pregnant at the end of the breeding season.

340 Subsequent calf BW was heavier for cows in the AFS<sub>14.0</sub> group compared to cows in AFS<sub>12.5</sub> and AFS<sub>15.5</sub>  
341 (+2kg; P < 0.05; Table 6).

342 Feed intake was not different neither between feeding treatment, nor between AFS groups (17 kg  
343 DM/d; Appendix 1). Morphological traits analysis based on age at first calving cohorts 2009-10 and  
344 2010-11 (supplementary files 1) indicated that young cows at first calving (21 mo of age on average,  
345 n= 30; AFC<sub>21</sub>) were not only lighter compared to heifers first calving at average age of 23.5 (n = 39;  
346 AFC<sub>23.5</sub>) or 25 (n = 36; AFC<sub>25</sub>) mo of age (498 vs 528 and 563 kg respectively, P < 0.05) but they also  
347 presented reduced morphological traits. For example, HW was 137.4, 139.1 and 140.4 cm for AFC<sub>21</sub>;  
348 AFC<sub>23.5</sub> and AFC<sub>25</sub> respectively; P < 0.05). However, at a similar age (25 mo for example), no such  
349 difference was noticed between treatments (140.7, 140.4 and 142 mm).

350

## 351 Discussion

352 Present experiment indicates that reducing age at first service down to around 1 year of age, and  
353 consequently, age at first calving down to 22 mo of age or less had limited impact on performance of  
354 Holstein primiparous cows. Several authors have shown that calving down heifers between 23-26  
355 months of age increases longevity and maximises economic returns (Bach 2011; Wathes *et al.*, 2014;  
356 Boulton *et al.*, 2017). The early rearing period is a key period to achieve this target, as sub-optimal  
357 nutrition delays the onset of puberty and adversely affects skeletal growth and increases the risk of  
358 dystocia at first calving (Ettema and Santos 2004). Poor growth is also one of the main reasons for  
359 culling heifers prior to calving (Esslemont and Kossaibati 1997). Pre-weaning growth in dairy heifers  
360 has generally been associated with performance in first lactation (Khan *et al.* 2011; Soberon *et al.*,  
361 2012). Some studies reported, however, that pre-weaning differences associated with different  
362 feeding regimes were no longer statistically significant as calves aged (Morrison *et al.* 2009; Quigley  
363 *et al.* 2006). This may in part be explained by compensatory increase in growth for animals when feed  
364 allowance (level, energy, protein) is not limited after a period of restriction.

365

366 The difference in feed allowance resulted in different development and size at 6 and 12 mo of age,  
367 but it has limited effect on BW at weaning. In a study of Johnson *et al.* (2019), the two treatment groups  
368 before weaning induced significant differences in size in pre-weaning performance and this persisted  
369 until six months. In our case, the high level of feed allowance before weaning, without restriction of  
370 total mixes ration for control heifers, probably explain that no difference on BW at weaning was  
371 observed. Usually, the amount of milk until weaning is low in most practices: about 4 to 6 L/day of  
372 whole milk, or 400 to 600 g of milk replacer (MR) until weaning at 42-56 days of age (Morrison *et al.*  
373 2009). According to Jasper and Weary (2002), *ad libitum* milk intake is around 12 L/day of whole milk,  
374 and in present study, it varied around 9 L/d per heifer until 11 weeks of age. The development and  
375 BW of animals at 6 mo of age were high (111 cm heart girth and 220 kg body weight, for example),  
376 which fits well with recommendation for optimal age at first calving at 24 mo of age or less. In a study

377 of Ettema and Santos (2004) on importance of age and BW at first calving for Holstein heifers, only  
378 2.7% of dairy farms achieve the recommended targets and, therefore, this leads to economic losses.  
379 Total nutrient intake, source of energy and protein content of the diet have additive effects on how  
380 calves partition nutrients into tissue (Van Amburgh and Drackley 2005). During milking phase, calves  
381 benefit when MRs contain more protein and less fat, achieving higher levels of skeletal growth (Hill *et al.*,  
382 2010). Providing greater quantities of MR therefore improves both growth and feed efficiency  
383 (Bartlett *et al.*, 2006). Increased nutrient intake is also associated with increased plasma IGF1 (Smith  
384 *et al.*, 2002; Bartlett *et al.*, 2006) which in part regulates the subsequent growth rate (Hammon *et al.*,  
385 2002; Brickell *et al.*, 2009a).

386  
387 The effect of intensive growth during rearing have been presented and discussed in several papers  
388 (Le Cozler *et al.* 2008), and as already presented in these papers, increasing growth rate resulted in  
389 earlier puberty in (Abeni *et al.*, 2019). However, authors do not agree on the impact on milk  
390 performance. Indeed, while some authors noticed a negative impact on milk production, other did not.  
391 Abeni *et al.* (2000) and Van Amburgh *et al.* (1998) concluded that calving earlier than 23 mo of age  
392 is associated with lower milk yields and lower milk fat content, although, it also leads to a higher milk  
393 protein content. They concluded as well that earlier calving leads to reduced reproduction  
394 performance. In a more recent study, Krpáľková *et al.* (2014) did not observe effect of age at first  
395 calving on milk yields, except on milk yield in the first 100 d of first lactation and even found that the  
396 highest milk yield in the second lactation, third lactation for an age at first calving lower than 699 days.  
397 In the present paper, a negative impact was noticed at the start of lactation 1 only. In their study, Van  
398 De Stroet *et al.* (2016) also observed that pre-weaning growth has associations with milk yield in later  
399 life, but the differences in milk yield were most apparent during early and peak lactation. In particular,  
400 higher calf growth rates were not significantly associated with future milk yield but were associated  
401 with higher BW in lactating cows and higher odds of survival to first lactation. When milk lactation was  
402 corrected to BW, no difference was found in milk yield or composition, regardless of rearing treatment.

403  
404 Decreasing age at first calving is an effective way to decrease the length of non-productive days  
405 during rearing and first calving at around 24 months of age appears to be is optimal for profitable  
406 production (Mourits *et al.*, 1999b; Ettema and Santos; 2004; Shamay *et al.*, 2005). In a metanalysis  
407 based on results from 100 herds, Mohd Nor *et al.* (2013) estimated that heifers having a first calving  
408 age of 24 mo produced, on average, 7 164 kg of milk per 305 d, and calving 1 mo earlier gave 143  
409 kg less milk on a 305 d lactation length basis. In present study, we also noticed that young heifers  
410 produced less milk during the first part of lactation, but the total milk yield over 305 d was not different.  
411 However, it could be noticed that despite no difference from the statistical point of view, the difference  
412 was very similar when age at first calving decreased from 24.8 to 23.8 mo of age: 134 kg less on a  
413 305 d basis.

414

415 In present study, fertility was not affected by age at first service. In a previous paper on puberty  
416 attainment based on 2011-12 cohort, we noticed that most heifers reached puberty before oestrus  
417 synchronisation, at an average age of  $10.3 \pm 2.2$  mo (6.2 to 14.4 mo), averaging  $296 \pm 40$  kg (224 to  
418 369 kg) BW (Abeni *et al.*, 2019). It occurred one mo earlier for ID2 heifers than in SD and ID1 heifers.  
419 Puberty onset at 9 to 10 mo of age or less meant that 3 or 4 oestrous cycles occurred before  
420 insemination, which is generally consistent with good fertility results in many species (Lin *et al.*, 1986;  
421 Byerley *et al.*, 1987; Robinson, 1990; Le Cozler *et al.*, 1999). Regardless of calving strategy, lowering  
422 the age at puberty and, consequently, the age at first insemination means that it is an efficient way to  
423 shorten the non-productive period before calving. However, as suggested by Meyer *et al.* (2006), it  
424 might reduce pre-pubertal mammary gland development by shortening the allometric phase of  
425 mammary gland growth and, in some cases, impair further milk production. Similar to fertility in heifers,  
426 fertility in primiparous cows during first lactation was not affected with age at first calving. Wathes *et al.*  
427 (2008) reported that optimal fertility and maintenance of maximum performance in the first lactation  
428 were reached at the calving age of 24 to 25 mo, although heifers that calved at the age of 22 to 23  
429 mo were the best in overall performance and longevity over 5 year, partly because heifers with good  
430 fertility also had a high level of fertility as cows.

431

432 Finally, In the present paper, we also noticed that for a similar feed allowance, early calving heifers  
433 ate a similar amount of feed, produced less milk and at the end, were able to catch the difference in  
434 BW and development. All these results indicate that, as already reported by Krpáľková *et al.* (2014),  
435 the objective of a rearing period leading to an age at first calving less than 23 mo of age in Holstein  
436 heifers proves to be a suitable option for successful rearing of heifers with optimal subsequent  
437 production and reproduction in a herd with suitable management.

438

### 439 **Acknowledgements**

440 The authors would like to thank the technical staff of the INRA experimental farm of Méjusse for  
441 their commitment in taking care of the animals and make sure the experiment run smoothly.

442

### 443 **Declaration of interest**

444 The authors declare that the research was conducted in the absence of any commercial or financial  
445 relationships that could be construed as a potential conflict of interest.

446



447 **Ethics statement**

448 Experimental work has been conducted in accordance with French national legislation on the use of  
449 animals for research. Protocol received agreement (00944-02) from French Ethical Committee n°7.

450

451 **Software and data repository resources**

452 None of the data were deposited in an official repository.

453

454 **References**

455 Abeni F, Calamari L, Stefanini L, Pirlo G 2000. Effects of daily gain in pre-and postpubertal  
456 replacement dairy heifers on body condition score, body size, metabolic profile, and future milk  
457 production. *Journal of Dairy Science* 83, 1468–1478.

458 Abeni F, Petrera F, Le Cozler Y 2019. Effects of feeding treatment on growth rates, metabolic profiles,  
459 and age at puberty, and their relationships in dairy heifers. *Animal*, 13(5):1020-1029.

460 Agabriel J, Meschy F 2007. Alimentation des veaux et génisses d'élevage. In *Alimentation des bovins,*  
461 *ovins et caprins.* Editions Quae, Versailles, chapitre 4, pp 75-87.

462 Bach A, Ahedo J 2008. Record keeping and economics of dairy heifers. *Veterinary Clinics of North*  
463 *America Food Animal Practice*, 24, 117–138.

464 Bach A 2011. Associations between several aspects of heifer development and dairy cow survivability  
465 to second lactation. *Journal of Dairy Science*, 94, 1052–1057.

466 Bartlett KS, McKeith FK, Van de Haar MJ, Dahl GE, Drackley JK 2006. Growth and body composition  
467 of dairy calves fed milk replacers containing different amounts of protein at two feeding rates.  
468 *Journal of Animal Science*, 84, 1454–1467.

469 Bazin S, Augeard P, Carteau M, Champion H, Chilliard Y, Cuyllé G, Disenhaus C, Durand G,  
470 Espinasse R, Gascoin A, Godineau M, Jouanne D, Ollivier O, Remond B 1984. Grille de notation  
471 de l'état d'engraissement des vaches pie-noires. Institut Technique de l'Élevage Bovin, Paris,  
472 France.

473 Boulton AC, Rushton J, Wathes DC 2017. An empirical analysis of the cost of rearing dairy heifers  
474 from birth to first calving and the time taken to repay these costs. *Animal*, 11, 1372–1380.

475 Brickell JS, McGowan MM, Wathes DC 2009. Effect of management factors and blood metabolites  
476 during the rearing period on growth of dairy heifers on UK farms. *Domestic Animal*  
477 *Endocrinology*, 36, 67-81.

478 Byerley DJ, Staigmiller RB, Berardinelli JG, Short RE 1987. Pregnancy rates of beef heifers bred  
479 either on pubertal or third oestrus. *Journal of Animal Science*, 65, 645–650.

480 Cutullic,E, Delaby L, Gallard Y, Disenhaus C 2011. Dairy cows' reproductive response to feeding level  
481 differs according to the reproductive stage and the breed, *Animal*, 5, 731-740.

- 482 Esslemont R, Kossaibati M 1997. The cost of respiratory diseases in dairy heifer calves. *The Bovine*  
483 *Practitioner* 33, 174–178.
- 484 Ettema JF, Santos EP 2004. Impact of age at calving on lactation, reproduction, health, and income  
485 in first-parity Holsteins on commercial farms. *Journal of Dairy Science* 87, 2730–2742.
- 486 Hammon HM, Schiessler G, Nussbaum A, Blum JW 2002. Feed Intake Patterns, Growth  
487 Performance, and Metabolic and Endocrine Traits in Calves Fed Unlimited Amounts of  
488 Colostrum and Milk by Automate, Starting in the Neonatal Period. *Journal of Dairy Science*, 85,  
489 3352–3362
- 490 Hill T M, Bateman HG, Aldrich JM, Schlotterbeck RL 2010. Effect of milk replacer program on  
491 digestion of nutrients in dairy calves. *Journal of Dairy Science*, 93, 1105–1115.
- 492 Jasper J, Weary DM 2002. Effects of ad libitum milk intake on dairy calves. *Journal of Dairy Science*,  
493 85, 3054–3058.
- 494 Johnson KF, Vinod Nair R, Wathes DC 2019. Comparison of the effects of high and low milk-replacer  
495 feeding regimens on health and growth of crossbred dairy heifers. *Animal Production Science*,  
496 59, 1648–1659.
- 497 Khan MA, Weary DM, von Keyserlingk MAG 2011. *Invited review*: Effects of milk ration on solid feed  
498 intake, weaning, and performance in dairy heifers. *Journal of Dairy Science*, 94, 1071–1081.
- 499 Krpáľková L, Cabrera VE, Kvapilík J, Burdych J, Crump P 2014. Associations between age at first  
500 calving, rearing average daily weight gain, herd milk yield and dairy herd production,  
501 reproduction, and profitability. *Journal of Dairy Science*, 97, 6573–6582.
- 502 Le Cozler Y, Ringmar-Cederberg E, Johansen S, Dourmad JY, Neil M, Stern S, 1999. Effect of feeding  
503 level during rearing and mating strategy on performance of Swedish Yorkshire sows. 1. Growth,  
504 puberty and conception rate. *Animal Science*, 68, 355–363.
- 505 Le Cozler Y, Lollivier V, Lacasse P, Disenhaus C 2008. Rearing strategy and optimizing first-calving  
506 targets in dairy heifers: a review. *Animal*, 2, 1393-1404.
- 507 Lin CY, McAllister AJ, Batra TR, Lee AJ, Roy GL, Vesely JA, Wauthy JM, Winter KA 1986. Production  
508 and reproduction of early and late bred dairy heifers. *Journal of Dairy Science*, 69, 760–768.
- 509 Meyer MJ, Capuco AV, Ross DA, Lintault LM, Van Amburgh ME 2006. Development and nutritional  
510 regulation of the prepubertal heifer mammary gland: I. Parenchyma and fat pad mass and  
511 composition. *Journal of Dairy Science* 89, 4289–4297.
- 512 Mohd Nor N, Steeneveld W, van Werven T, Mourits MCM, Hogeveen H 2013. First-calving age and  
513 first-lactation milk production on Dutch dairy farms. *Journal of Dairy Science*, 96, 981–992.
- 514 Morrison SJ, Wicks HCF, Fallon RJ, Twigge J, Dawson LER, Wylie ARG, Carson AF 2009. Effects of  
515 feeding level and protein content of milk replacer on the performance of dairy herd  
516 replacements. *Animal*, 3, 1570–1579.
- 517 Mourits MCM, Huirne RBM, Dijkhuizen AA, Kristensen AR, Galligan DT 1999. Economic optimization  
518 of dairy heifer management decisions. *Agricultural Systems*, 61, 17–31.

- 519 Petersson KJ, Gustafsson H, Strandberg E, Berglund B 2006. Atypical progesterone profiles and  
520 fertility in Swedish dairy cows. *Journal of Dairy Science*, 89, 2529–2538.
- 521 Pirlo G, Capelletti M, Marchetto G 1997. Effects of energy and protein allowances in the diets of  
522 prepubertal heifers on growth and milk production. *Journal of Dairy Science*, 80, 730–739.
- 523 Quigley JD, Wolfe TA, Elsasser TH 2006. Effects of additional milk replacer feeding on calf health,  
524 growth, and selected blood metabolites in calves. *Journal of Dairy Science*, 89, 207–216.
- 525 Robinson JJ 1990. Nutrition in the reproduction of farm animals. *Nutrition Research Reviews*, 3, 253–  
526 276.
- 527 R Core Team 2019. R: A Language and Environment for Statistical Computing. R Development Core  
528 Team, Vienna, Austria.
- 529 Shamay A, Homans R, Fuerman Y, Levin I, Barash H, Silanikove N, Mabjeesh SJ 2005. Expression  
530 of albumin in nonhepatic tissues and its synthesis by the bovine mammary gland. *Journal of*  
531 *Dairy Science*, 88, 569–576.
- 532 Smith JM, Van Amburgh ME, Diaz MC, Lucy MC, Bauman DE 2002. Effect of nutrient intake on the  
533 development of the somatotrophic axis and its responsiveness to GH in Holstein bull calves.  
534 *Journal of Animal Science*, 80, 1528–1537.
- 535 Soberon F, Raffrenato E, Everett RW, van Amburgh ME 2012. Prewaning milk replacer intake and  
536 effects on long-term productivity of dairy calves. *Journal of Dairy Science*, 95, 783–793.
- 537 Tozer PR 2000. Least-cost ration formulations for Holstein dairy heifers by using linear and stochastic  
538 programming. *Journal of Dairy Science* 83, 443–451.
- 539 Van Amburgh ME, Galton DM, Fox DG, Bauman DE, Chase LE, Erb HN, Everett RW 1998. Effects  
540 of three prepubertal body growth rates on performance of Holstein heifers during first lactation.  
541 *Journal of Dairy Science*, 81, 527-538.
- 542 Van Amburgh ME, Drackley J 2005. Current perspectives on the energy and protein requirements of  
543 the pre-weaned calf. Chapter 5 in *Calf and Heifer Rearing*. P.C. Garnsworthy, ed. Nottingham  
544 University Press, Nottingham, UK.
- 545 Van De Stroet DL, Calderón Díaz JA, Stalder KJ, Heinrichs AJ, Dechow CD, 2016. Association of calf  
546 growth traits with production characteristics in dairy cattle. *Journal of Dairy Science* 99, 8347–  
547 8355.
- 548 Wathes DC, Brickell JS, Bourne NE, Swali A, Cheng Z 2008. Factors influencing heifer survival and  
549 fertility on commercial dairy farms. *Animal*, 2, 1135–1143.
- 550 Wathes DC, Pollott GE, Johnson KF, Richardson H, Cooke JS 2014. Heifer fertility and carry over  
551 consequences for lifetime production in dairy and beef cattle. *Animal* 8 (suppl. 1), 91–104.
- 552
