1 **Effects of feeding treatment on growth rate and performance of primiparous Holstein dairy**  
2 **heifers**

3  
4 Y. Le Cozler <sup>1</sup>, J. Jurquet <sup>2</sup>, N. Bedere <sup>3\*</sup>

5  
6 <sup>1</sup> INRAE, AGROCAMPUS OUEST, PEGASE, F-35590, Saint-Gilles, France

7 <sup>2</sup> Institut de l'Élevage, Monvoisin, 35652 Le Rheu, France

8 <sup>3</sup> URSE, Ecole Supérieure d'Agricultures, Université de Bretagne Loire, 55 rue Rabelais, Angers,  
9 France

10 \* Current address: INRAE, AGROCAMPUS OUEST, PEGASE, F-35590, Saint-Gilles, France

11

12 Corresponding author: Yannick Le Cozler. E-mail: [yannick.lecozler@agrocampus-ouest.fr](mailto:yannick.lecozler@agrocampus-ouest.fr)

13

14 **Abstract**

15 The objective of this study was to investigate effects of feeding-rearing programs that aim for first  
16 calving at 20-27 months (mo) of age on growth, reproduction and production performance of  
17 Holstein cows at nulliparous and primiparous stages. We hypothesised that, in a seasonal autumn-  
18 calving strategy, heifers born late in the season could catch up to the growth of heifers born earlier  
19 and be inseminated during the same period, at a body weight (BW) of at least 370 kg. This  
20 approach would result in first calving age at 21-22 mo of age without impairing their later  
21 performance. To test this hypothesis, we studied 217 heifers over 3 years. They were split into three  
22 treatment groups: control feeding (SD), an intensive-plane diet (ID1) from birth to 6 mo of age or an  
23 intensive-plane diet from birth to one year of age. Heifers in groups SD and ID1 were born from  
24 September until the end of November, while those in ID2 were born later. The present study  
25 showed that late-born heifers (ID2) could catch up with the growth of the others due to the feeding  
26 treatment, although they were still 42 kg lighter than the SD and ID1 heifers at first calving. No  
27 difference in reproductive performance was observed among groups. Once primiparous, the cows  
28 reared with the ID2 treatment tended to produce less milk than SD and ID1 cows (ca. 400 kg less  
29 on a 305 d basis throughout lactation), and no differences in milk composition, feed intake, body  
30 condition score or BW were observed among groups. Age at first service (AFS) was classified *a*  
31 *posteriori* into three classes: 12.5 (AFS<sub>12.5</sub>), 14.0 (AFS<sub>14.0</sub>) and 15.5 mo (AFS<sub>15.5</sub>) of age. Heifers in  
32 AFS<sub>12.5</sub> grew faster than those in AFS<sub>14.0</sub> and AFS<sub>15.5</sub>. Once primiparous, the AFS<sub>12.5</sub> cows tended to  
33 produce less milk at peak than AFS<sub>14.0</sub> and AFS<sub>15.5</sub> cows (ca. 1.5 kg/d less) although no difference  
34 in total milk yield during lactation was observed. No differences in milk composition, feed intake,  
35 body condition score or BW were observed among groups. These results support the conclusion  
36 that the feeding treatment can enable late-born heifers to catch up to the growth of heifers born  
37 earlier in the season. This strategy results in an earlier first calving that does not impair their

38 reproductive performance but does decrease milk yield slightly during first lactation. Future studies  
39 should investigate long-term effects of this strategy.

40

41 **Key words:** dairy cattle, heifer, growth, reproduction, feeding treatment

42

### 43 **Implications**

44 Increasing the growth rate of dairy heifers decreased their age at puberty, potentially reducing age  
45 at first calving and ultimately shortening the non-productive rearing period. Heifers first calved at  
46 22.5 months (mo) of age or less had similar performances similar to heifers that first calved at 23.8  
47 mo of age or older.

48

### 49 **Introduction**

50 In seasonal calving systems, heifers usually first calve at a young age (ca. 24 months (mo)). The  
51 first insemination (i.e. service) may be delayed, however, for heifers born at the end of the calving  
52 period if an adequate body weight (BW) is not reached (i.e. 360-380 kg for Holstein heifers in  
53 French dairy herds; Le Cozler *et al.*, 2008). Increasing nutrient uptake and thus the growth rate of  
54 these late-born heifers is one solution to lower this risk. High growth rate during rearing is  
55 associated with decreased age at puberty; consequently, first calving may occur as early as 20-21  
56 mo of age. Tozer (2000) concluded that a higher plane of nutrition incurred higher daily feed costs,  
57 but these costs were recouped when heifers calved at a younger age through savings on labour,  
58 housing and overall feed costs. Regardless of the rearing strategy (group-calving or not), animals  
59 need to reach an adequate body size and or body weight before calving to avoid compromising milk  
60 production during the first lactation (Bach and Ahedo, 2008). Indeed, an accelerated growth  
61 program for dairy heifers cannot focus only on early onset of puberty. Many authors have studied  
62 the influence of growth intensity on future performances (Le Cozler *et al.*, 2008). Most studies  
63 indicated that a too-rapid growth rate had a negative influence, while some indicated that  
64 accelerated growth had little impact. According to Pirlo *et al.* (1997), reducing the age of first calving  
65 to 23 to 24 mo was the most profitable procedure, but no less than 22 mo (except in cases of low  
66 milk prices and high rearing costs). They concluded that the reluctance to decrease the age of first  
67 calving is generally attribute to the belief that early calving is detrimental to milk yield and longevity.  
68 We designed and conducted an experiment to determine the influence of feeding treatments on  
69 growth parameters, reproduction and the production performance of Holstein primiparous heifers  
70 that first calved from 20-27 mo of age in a seasonal calving system. We assumed that genetic  
71 improvements in dairy production over the past few decades had yielded animals that could calve  
72 earlier than 24 mo of age. We also assumed that results for animals reared in a seasonal calving  
73 strategy could be used and generalised for those in a non-grouped strategy. We examined the

74 potential for late-born heifers to catch up to the rest of the heifers by the first artificial insemination  
75 (AI) at a minimum BW of 370-380 kg, resulting in a first calving at less than 22 mo of age.

76

## 77 **Materials and methods**

### 78 ***General design***

79 A total of 217 Holstein heifers, born during the calving season in 2009-10 (n = 65), 2010-11 (n = 73)  
80 and 2011-12 (n = 76; September to February), were reared and followed until oestrus  
81 synchronisation (12-15 mo of age) at the INRA experimental farm of Méjusseume (Le Rheu,  
82 France). For details of the rearing procedures and strategies used in the present study, see Abeni *et*  
83 *al.* (2019). Calves born from 1 September to 30 November were alternately assigned to 1 of two  
84 nutritional treatments (according to birth order) and fed either a standard diet (SD) or an intensive-  
85 plane diet (ID1) from 0-6 mo of age. It was expected that heifers fed the SD and ID1 diets would  
86 reach 190-200 and 220-230 kg at 6 mo of age, respectively. Heifers born after 1 December (ID2)  
87 received the same intensive-plane diet as ID1 heifers from 0-6 mo of age to decrease potential  
88 interaction between age and treatment during this period. Thereafter, a supplemental diet was  
89 formulated for ID2 heifers to enable them to reach 380 kg at 12 mo of age. The main objective of  
90 the ID2 diet was to study the potential for late-born heifers to catch up to the rest of the heifers by  
91 the first AI at a minimum BW of 370-380 kg. It was expected that this strategy would correspond to a  
92 mean age of 15 mo for SD and ID1 heifers and 12 mo for ID2 heifers. In year one, heifers grazed  
93 from mid-May until the end of October. In year two, heifers grazed from the end of March until  
94 calving season (starting 1 September). At the end of the first grazing season, all heifers were group-  
95 housed until being turned out to pasture in the second season. Three weeks before the expected  
96 date of calving, heifers were placed in cow herds and individually fed a similar total mixed ration  
97 (TMR). During lactation, milk yield was recorded twice per day and animals were weighed one per  
98 day. The experiment ended 15 weeks after calving.

99

### 100 ***Feeding management***

101 Diets were formulated for each growth stage according to recommendations and procedures  
102 developed by Agabriel and Mechy (2007) to reach a targeted average daily gain (ADG) per period,  
103 as a function of the initial BW and feeding treatment used. In this approach, energy is expressed per  
104 UFL (forage unit for lactation, UFL/kg dry matter (DM)), which is the energy required for lactation  
105 (g/kg)/1760. For protein, PDIN (protein digestible in the small intestine, g/kg DM, when degradable  
106 nitrogen limits microbiological growth (INRA 2007) and PDIE (protein digestible in the small  
107 intestine, g/kg DM, when available energy limits microbial growth) are used. PDIN is the protein  
108 supplied by rumen-undegradable protein (PDIA) plus that supplied by microbial protein from rumen-  
109 degradable dietary protein. In comparison, PDIE is PDIA plus the microbial protein from rumen-  
110 fermented organic matter (INRA, 2007). At the end of the pre-experimental phase (0-10 d), heifers

111 were group-housed indoors on deep straw bedding. They were fed a reconstituted milk replacer  
 112 (MR) made from 135 g milk powder (23.9% crude protein and 19.0% fat content) and 865 g water  
 113 per L until weaning (ca. 77-84 d of age). They were reared in dynamic groups: calves entered the  
 114 group each week, while others left it at weaning. They were individually fed with automatic milk  
 115 feeding systems (AMFS), with *ad libitum* access to fresh water, straw and hay. Group size ranged  
 116 from 8-24 calves per AMFS. From day 11, milk was distributed according to the standard ration  
 117 routinely used in the experimental herd (SD) or the standard ration increased by 15% (ID1 & ID2).  
 118 All calves were fed TMR no. 1 (TMR1) *ad libitum* (Table 1). The TMR1 contained 47.5% of maize  
 119 silage, 47.5% of concentrate 1 and 5% of 18 % CP lucerne pellets.  
 120

Table 1. Ingredients and chemical composition of the experimental diets

| Item <sup>1</sup>                      | TMR1          | TMR2          | TMR3a     | TMR3b     | TMR4                 | TMR5                                           | TMR6                      | TMR7                                                   |
|----------------------------------------|---------------|---------------|-----------|-----------|----------------------|------------------------------------------------|---------------------------|--------------------------------------------------------|
| Stage of growth, age                   | (7 d to 4 mo) | (4 to 6-8 mo) | (9-11 mo) | (6-11 mo) | (11-15 mo; winter 1) | (21-26 mo) (21 d before calving until calving) | (21-26 mo) Calving + 14 d | (21-35 mo) (15 d after calving until end of lactation) |
| Feeding treatment                      | All           | All           | SD, ID1   | ID2       | All                  | All                                            | All                       | All                                                    |
| Ingredient, %                          |               |               |           |           |                      |                                                |                           |                                                        |
| Maize silage                           | 47.5          | 72.0          | 80.0      | 80.0      | 79.0                 | 84.5                                           | 52.5                      | 65.0                                                   |
| Soyabean meal                          | -             | 8.0           | 20.0      | 20.0      | 21.0                 | 9.0                                            | 8.0                       | 8.0                                                    |
| 18% CP lucerne pellets                 | 5.0           |               |           |           |                      |                                                | 10.0                      | 10.0                                                   |
| Straw                                  |               |               |           |           |                      |                                                |                           |                                                        |
| Urea                                   |               |               |           |           |                      | 2.5                                            | 2.5                       | 2.5                                                    |
| Vitamins & minerals                    |               |               |           |           |                      |                                                |                           | 0.8                                                    |
| Concentrate 1 <sup>2</sup>             | 47.5          | 20.0          |           |           |                      |                                                |                           |                                                        |
| Concentrate 2 <sup>3</sup> (kg/head/d) |               |               | 1.0       | 2.0       | 1.0                  |                                                |                           | 1.0                                                    |
| Concentrate 3 <sup>4</sup> (%)         |               |               |           |           |                      | 4.0                                            | 25                        | 15.0                                                   |
| Estimated chemical composition         |               |               |           |           |                      |                                                |                           |                                                        |
| DM, %                                  | 51.4          | 42.0          | 42.2      | 46.0      | 42.1                 | 38.6                                           | 48.8                      | 44.4                                                   |
| PDIE, g / kg DM                        | 93.0          | 93.1          | 104.5     | 103.1     | 106.2                | 85.0                                           | 93.7                      | 89.6                                                   |
| PDIN, g / kg DM                        | 79.8          | 84.0          | 108.7     | 108.5     | 111.3                | 72.8                                           | 83.9                      | 91.3                                                   |
| UFL / kg DM                            | 0.96          | 0.96          | 0.98      | 1.00      | 0.99                 | 0.93                                           | 0.93                      | 0.92                                                   |

<sup>1</sup> abbreviations: TMR: total mixed ration; SD, ID1, ID2: animals fed a standard (SD) or increased-plane (ID1 & ID2) feeding treatment; DM: dry matter; UFL: forage unit for lactation, UFL/kg DM; PDIN: protein digestible in the small intestine when degradable nitrogen limits microbiological growth (g/kg DM); PDIE: protein digestible in the small intestine when available energy limits microbial growth (g/kg DM; INRA, 2007).

<sup>2</sup> Chemical composition: DM 88.7%; PDIE 118 g; PDIN 114 g; UFL 1.05.

<sup>3</sup> Chemical composition: DM 87.9%; PDIE 81 g; PDIN 90 g; UFL 0.96.

<sup>4</sup> Chemical composition: DM 87.7%; PDIE 101 g; PDIN 76 g; UFL 1.05.

121  
 122 From weaning to 6-8 mo of age, calves were housed on deep straw bedding with *ad libitum* access  
 123 to fresh water and straw. Until 4 mo of age, the SD group received TMR1 *ad libitum* until the  
 124 maximum daily allowance of concentrate intake reached 2 kg DM/head/d. No restriction was applied  
 125 for ID1 or ID2 heifers. From 4 to 6-8 mo of age, TMR2 was distributed *ad libitum* until concentrate

126 intake reached 2.0, 2.5 and 2.5 kg DM/head/d for SD, ID1 and ID2 heifers, respectively i.e. total  
127 daily allowance of 10.0, 12.5 and 12.5 kg DM/head/d, respectively. These amounts did not change  
128 until being turned out to pasture. The TMR2 contained 72% of maize silage, 8% of soya bean meal  
129 and 20% of concentrate 1.

130 SD, ID1 and ID2 heifers were turned out to pasture from mid-May, mid-May and mid-June,  
131 respectively, and rotationally grazed on a perennial ryegrass sward. After a 5-d transition phase and  
132 throughout the grazing season, the SD and ID1 groups received a supplement of 1 kg DM/heifer/d  
133 of concentrate 2. The ID2 group received 1 kg DM/heifer/d of maize silage and 2 kg DM/heifer/d of  
134 concentrate 2. Grass availability and/or quality were insufficient to maintain the desired growth rates  
135 during summer. SD and ID1 heifers then received up to 2.5 kg DM/heifer/d of additional TMR3a,  
136 plus 1 kg DM/heifer/d of concentrate 2. ID2 heifers received up to 3 kg DM/heifer/d of TMR3b, plus  
137 2 kg DM/heifer/d of concentrate 2. To reach 380 kg at the end of the grazing season (when oestrus  
138 synchronisation started), the expected ADG for SD and ID1 heifers was ca. 600 g/d during this  
139 period, with a feeding regime based on grass plus 1 kg DM/heifer/d of concentrate 2, and 800 g/d  
140 when receiving grass plus TMR3a. For ID2 heifers, it was estimated that grass alone was not  
141 sufficient to reach 900 g/d during the same period, so TMR3b was used (Table 1). In the pasture  
142 area, a permanent headlock barrier (80 places on a concrete floor) was used daily to feed  
143 concentrate to SD and ID1 heifers. Heifers were locked in for 1 hour while eating to decrease  
144 competition between heifers for feed. Since the ID2 group had *ad libitum* access to the ration, its  
145 heifers were not locked in. At the end of the first grazing season (the first week of November),  
146 heifers were group-housed (8 heifers/pen) on deep straw bedding and received 3.8 kg DM/head/d  
147 of a diet containing 79% maize silage and 21% soya bean meal. They had *ad libitum* access to  
148 fresh water, straw and mineral supplements.

149 Vitamins and minerals, when not included in the concentrate during rearing, were included in  
150 mineral blocks that contained 2.5% Ca, 2.0% Mg and 32.5% Na per kg of DM, as well as (in mg/kg)  
151 Zn (10 000), Mn (8250), Cu (1500), I (200), Se (20) and Co (13). The concentrates during growth  
152 contained 4% P, 27% Ca, 5% Mg, plus vitamins (in UI/kg; 1 000 000 vitamin A, 350 000 vitamin D3  
153 and 8 000 vitamin E). They also contained (in mg/kg) Cu (1500), Zn (10 000), I (200), Co (100) and  
154 Se (10). During lactation, the mineral supplement contained 7% P, 22% Ca and 4% Mg, plus  
155 vitamins (in UI/kg; 500 000 vitamin A, 100 000 vitamin D3 and 1 500 vitamin E). It also contained (in  
156 mg/kg) Cu (1000), Mn (3500), Zn (4530), I (80), Co (35) and Se (22).

157 After a 2-week adaptation period, heifers' oestrous cycles were synchronised (see below), and the  
158 same rearing procedure was applied to all heifers. Heifers were turned out to pasture (generally in  
159 March) based on the date of successful insemination. They were reared in a single group and  
160 received no additional feed except for grass, along with the supplemental vitamins and minerals.

161 All heifers were housed indoors three weeks before the expected date of calving, along with  
162 multiparous cows, in a cubicle barn with fresh straw bedding that was distributed daily. Heifers were

163 fed individually and received TMR5 daily, composed of maize silage (84.5%), soya bean meal (9%),  
164 concentrate (4%) and straw. From calving to 14 d post-calving, cows individually received TMR6,  
165 which contained maize silage (52.5%), soya bean meal (8%), concentrate (25%), dehydrated  
166 lucerne (1%), vitamin/mineral supplements, urea and straw (Table 1).

167 From day 14 after calving, cows individually received TMR7, which contained maize silage (65%),  
168 soya bean meal (8%), concentrate (15%), dehydrated lucerne (1%), urea and vitamin/mineral  
169 supplements (7% P, 22% Ca and 4% Mg). All cows were fed *ad libitum* during lactation assuming at  
170 least 10% refusal per day. Feed was distributed twice per day (08:00 and 17:00), and refusals were  
171 collected each morning (7:00) before fresh TMR was distributed.

172 The chemical composition of TMR ingredients produced on-farm (maize silage, straw) was  
173 determined at harvest, and an average sample of each, came from daily sample, was analysed.  
174 Another analyse was also done when the storage silo of maize silage changed. However, DM was  
175 determined at least once a week for all TMR ingredients. A similar procedure was applied to  
176 concentrate feed. The manufacturer analysed the feed (e.g. concentrate, soya bean) before  
177 delivering it, and we compared it to the average sample when changing feed. The estimated  
178 chemical composition of TMR was then determined using INRA<sup>®</sup> software (INRA, 2010) based  
179 on these analyses and the percentage of each ingredient in the TMR. Due to potential changes in  
180 composition (e.g. DM or grain content of maize silage), TMR composition was checked regularly,  
181 and the amount of each ingredient was adapted accordingly. Grass intake was not measured. All  
182 heifers and cows housed indoors had *ad libitum* access to fresh water during the entire experiment.

183

### 184 **Age at first service**

185 Age at first service (AFS) was then classified to understand better which factors could influence AFS  
186 and how future performance may be related to AFS. Three classes were created, with nearly an  
187 equal number of animals in each (Table 2).

188

Table 2. Description of the classes of age (in mo) at first service (AFS)

| Characteristic   | AFS <sub>12.5</sub> | AFS <sub>14.0</sub> | AFS <sub>15.5</sub> |
|------------------|---------------------|---------------------|---------------------|
| AFS <sup>1</sup> | 12.6 (0.73)         | 14.2 (0.36)         | 15.4 (0.65)         |
| Total heifers    | 58                  | 57                  | 60                  |
| Heifers in SD    | 16                  | 29                  | 29                  |
| Heifers in ID1   | 15                  | 27                  | 30                  |
| Heifers in ID2   | 27                  | 1                   | 1                   |

<sup>1</sup>Mean (and standard deviation) of age at first service (AFS)

189

### 190 **Oestrus synchronisation**

191 All heifers were inseminated after oestrus synchronisation during the second winter of rearing so  
192 that calving would occur at ca. 24 mo of age. At the end of November, oestrus was synchronised for  
193 nearly half of the heifers using a progestin ear implant (Norgestomet<sup>®</sup>, Intervet, Angers, France)

194 along with an intramuscular injection of oestrogen (Crestar®, Intervet, Angers, France), without  
195 considering ovarian activity. A second synchronisation was performed three weeks later for the  
196 remaining heifers. The ear implant was removed after 9 d of treatment. Heifers generally showed  
197 signs of oestrus within 24-96 h and were inseminated when oestrus was detected. Heifers that  
198 failed to conceive but exhibited further signs of oestrus were inseminated at the end of the  
199 reproductive season (April). Ultrasonography was conducted an average of 42 d after insemination  
200 to determine pregnancy. Non-gestating heifers were excluded from the rest of the experiment.

201

## 202 **Sampling and measurements**

203 Heifers were weighed every 14 d from birth to weaning, every 21 d from weaning until being turned  
204 out to pasture and every 28 d until the end of the experiment. BW was interpolated to compare the  
205 BW of heifers at similar stages of growth. ADGs were then calculated. Heifer health and care  
206 information was recorded throughout the experiment. The body condition score (BCS) was recorded  
207 three weeks before the expected date of calving and then once a month. The method and scale  
208 (ranging from 0-5) developed by Bazin *et al.* (1984) was used. BCS was scored by three trained  
209 technicians, whose scores were averaged.

210 Five measurements were recorded to monitor morphological traits during rearing and first lactation:  
211 heart girth (HG), chest depth, wither height (WH), hip width and backside width. A tape measure  
212 was used to measure HG, while a height gauge was used for the other measurements. The  
213 measurements were recorded only for the two first cohorts (2009-10 and 2010-11: Supplementary  
214 Fig. 1). Results were interpreted by class of age at first service calving (AFC), which was created  
215 later (not shown or discussed in the present article).

216 Daily feed intake was calculated individually as the daily feed allowance minus refusals. The  
217 allowance and refusals were assumed to have the same composition. DM of silage was determined  
218 five times per week, while DM of the pellets was determined once per week. Feed composition was  
219 estimated from average samples for maize silage, straw, soya bean and concentrate. Composition  
220 was not available for fresh grass (Table 1).

221

## 222 **Milk content analysis**

223 Milk yield was automatically recorded at each milking (i.e. twice per day). During six successive  
224 milkings (Tuesday-Thursday), milk samples were collected and analysed for each cow to determine  
225 the fat and protein contents (Milkoscan, Foss Electric, Hillerod, Denmark). Fat- and- protein-  
226 corrected milk (FPCM, kg) was calculated using the following equation (INRA, 2018):

$$227 \quad FPCM = MY \times \frac{[0.42 + 0.0053 \times (FC - 40) + 0.0032 \times (PC - 31)]}{0.42}$$

228 where FC is milk fat content (g/kg), PC is milk protein content (g/kg) and 0.42 is the UFL value for 1  
229 kg of milk containing 40 g/kg of fat and 31 g/kg of protein.

230

### 231 ***Milk progesterone analysis***

232 Morning milk samples were collected Monday, Wednesday and Friday from calving to two weeks  
233 after the service that induced pregnancy, or five weeks after the end of the breeding season (i.e.  
234 July), and were then stored at -20°C to determine progesterone using commercial ELISA kits (Milk  
235 Progesterone ELISA, Ridgeway Science Ltd., England). Coefficients of variation among assays for  
236 ELISA on 5 ng/ml control samples ranged from 8-14% among experimental years.

237

### 238 ***Determining Luteal Activity***

239 Two progesterone (P4) milk concentration thresholds were defined, following Petersson *et al.*  
240 (2006) and adapted by Cutullic *et al.* (2011), to distinguish (i) the baseline P4 level in milk from the  
241 luteal phase level (threshold 1) and (ii) a low luteal phase level from a high luteal phase level  
242 (threshold 2). P4 values were classified as negative (< threshold 1), positive (> threshold 2) or  
243 intermediate. An increase in P4 milk concentrations was considered to be induced by corpus luteum  
244 activity when at least two consecutive values were not negative and at least one was positive. Due  
245 to the sampling schedule (Monday, Wednesday and Friday), the interval between samples was 2 d  
246 or 3 d. A decrease in P4 milk concentration was considered to result from luteolysis of the corpus  
247 luteum when at least one value became negative. These definitions helped to identify and  
248 distinguish luteal phases from inter-luteal phases.

249

### 250 ***Qualifying Progesterone Profiles***

251 Physiological intervals were calculated for each luteal phase: commencement of luteal activity  
252 (CLA), cycle length (IOI), luteal phase length (LUT) and inter-luteal interval (ILI; for details, see  
253 Cutullic *et al.*, 2011). Ovulation was considered to induce a prolonged luteal phase (PLP) if the  
254 luteal phase exceeded 25 d. Ovulation was considered to be delayed if the inter-luteal interval  
255 exceeded 12 d. Based on these definitions, P4 profiles were classified as (i) normal, (ii) PLP profile  
256 (when at least one PLP was observed), (iii) delayed (D; if CLA > 60 d), (iv) interrupted (I; when at  
257 least one ovulation > 2 was delayed) and (v) disordered (Z; when luteal activity appeared irregular  
258 but could not be assigned to another abnormality class).

259

### 260 ***Calculations and statistical analysis***

261 All data on dairy cows (e.g. reproduction, milk yield, feed intake) was automatically stored in a  
262 dedicated recording system. Analyses of heifer growth and performance, as well as data on  
263 progesterone, were recorded in Microsoft Excel files. All data manipulation and statistical analyses  
264 were performed in R software using the *lm* procedure for ANOVA or *glm* for logistic regressions (R  
265 Core Team, 2019). Normal distribution of the residuals, equality of the variance and non-dependent



266 data were checked for all models. Quantitative traits (i.e. growth, age, BW, milk yield, BCS, CLA,  
267 cycle lengths) were studied using the following ANOVA model:

$$268 \quad y_{ij} = \mu + year_i + \left| \begin{matrix} AFS_j \\ T_j \end{matrix} \right| + e_{ij}$$

269 where  $y_{ij}$  is the variable of interest,  $\mu$  is the overall mean of the variable of interest,  $year_i$  is the fixed  
270 effect of the experimental year ( $i=1, 2$  or  $3$ ),  $AFS_j$  is the fixed effect of AFS ( $j= 12.5, 14.0$  or  $15.5$  mo)  
271 or  $T_j$  is the fixed effect of feeding treatment ( $j= SD, ID1$  or  $ID2$ ) included in the model, and  $e_{ij}$  is the  
272 random residual effect. Year was included as a fixed effect because there were only three levels  
273 (year1, year2, year3), and this approach seemed the most appropriate option given the small  
274 number of levels. Had year been included as a random effect, variance would have been estimated  
275 from only three levels, rendering it inaccurate.

276 Dichotomous traits (i.e. reproductive success and type of cyclicity pattern) were studied using the  
277 following logistic regression model:

$$278 \quad \log \left[ \frac{P(y_{ij} = 1)}{1 - P(y_{ij} = 1)} \right] = \mu + year_i + \left| \begin{matrix} AFS_j \\ T_j \end{matrix} \right| + \beta \times PRI_{ij}$$

279 where  $y_{ij}$  is the variable of interest,  $\mu$  is the overall mean and the fixed effects ( $year_i, AFS_j$  or  $T_j$ ) are  
280 the same as previously described.

281

282 For the reproductive performance of heifers, the covariate  $PRI_{ij}$  was added; it describes the effect of  
283 the interval from the removal of the last progesterone-releasing implant until insemination. This  
284 covariate was not required for the performance of cows because only heifers were synchronised.  
285 Effects were considered highly significant at  $P < 0.001$ , significant at  $P < 0.05$  and a trend at  $P < 0.10$ .

286

## 287 **Results**

288 Of the 217 heifers in the experiment, 175 successfully calved. The 42 that did not either died during  
289 rearing (7), were culled due to injuries (6) or were not pregnant within the breeding period  
290 considered for the present study (29).

291

### 292 ***Growth and reproductive performance of heifers***

293 Mean BW at birth was 41.3 kg ( $\pm 5.2$ ) and did not differ significantly among all groups (i.e. not  
294 associated with the feeding treatment,  $P = 0.85$ , or AFS,  $P = 0.15$ ; Table 3; Table 4).

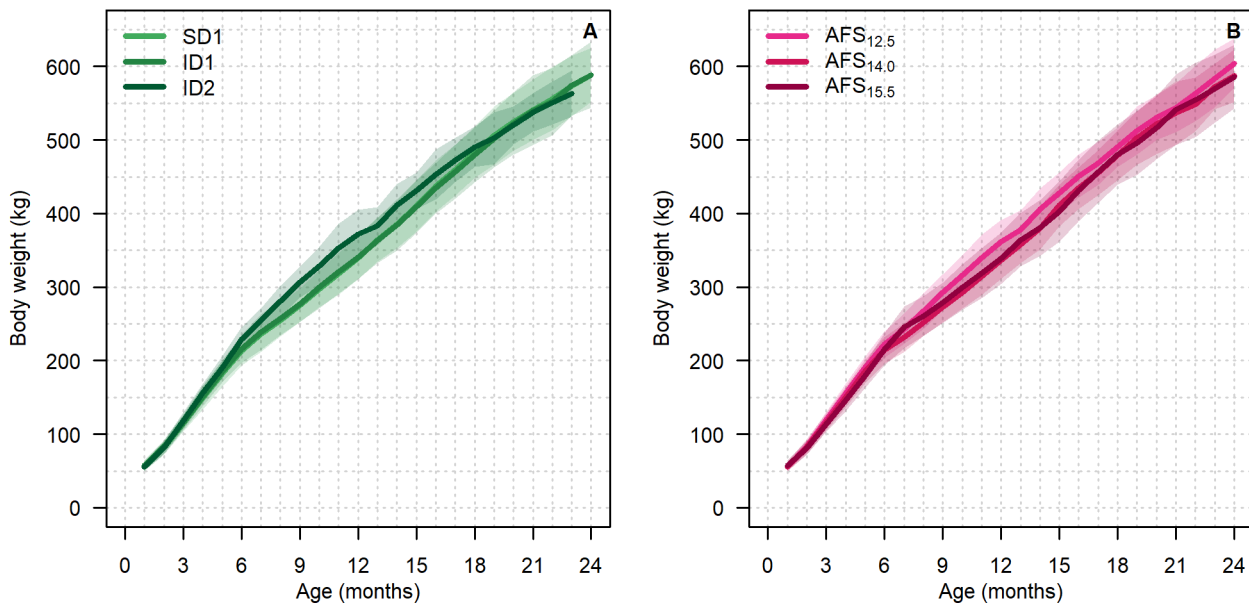

295

296

297

298

299

300

301

302

303

304

305

306

307

308

309

310

311

312

313

314

315

316

317

318

319

320

Figure 1. Mean body weight of heifers during the rearing period by (A) feeding treatment (SD, ID1, ID2: animals fed a standard (SD) or increased-plane (ID1 & ID2) feeding treatment) and (B) class of age at first service (AFS). Shaded areas are the dispersions of the data around the means ( $\pm$  one standard deviation).

The feeding treatment had little effect on growth during the milking phase, and heifers reached 117 kg ( $\pm$  11.8) at 3 mo of age (immediately after weaning). From weaning to 6 mo, heifers in the ID2 treatment were heavier than those in the SD and ID1 treatments (229 kg vs 213 kg and 217 kg at 6 mo, respectively;  $P < 0.001$ ; Fig. 1A). The highest ADG was observed for ID2 heifers from 0-6 mo (1042 vs 958 and 976 g/d for ID2, SD and ID1, respectively;  $P < 0.001$ , Table 3). This difference remained significant from 6-12 mo of age (789, 703 and 699 g/d for ID2, SD and ID1 heifers, respectively;  $P < 0.01$ , Table 3). However, from 12-18 mo, ADG was significantly lower for ID2 heifers than for SD and ID1 heifers (660 vs 800 and 774 g/d, respectively;  $P < 0.001$ , Table 3).

The feeding treatment had no effect on reproductive performance (Table 3), although ID2 heifers tended to have fewer services than SD or ID1 heifers (1.5 vs 1.9 or 1.8, respectively). Cows in the three feeding treatments had a similar interval from the start of the breeding season to the first service (13.5 d), similar success at the first service (ca. 62% of heifers pregnant) and a similar pregnancy rate by the end of the breeding season (94%).

No difference in calf BW (37.9 kg) was observed, despite a difference in their dam's BW at the first service and first calving (ID2 heifers were lighter than SD and ID1 heifers Table 3 and 5). ID2 heifers calved at a younger age than SD or ID1 heifers (ca. 2 mo earlier,  $P < 0.001$ ; Table 3).

Heifers inseminated at the youngest age (a mean of 12.5 mo; AFS<sub>12.5</sub>) tended to have a higher growth rate from 0-6 mo of age than those inseminated at 14.0 (AFS<sub>14.0</sub>) or 15.5 (AFS<sub>15.5</sub>) mo of age (1001 vs 960 or 978 g/d, respectively;  $P < 0.10$ ; Table 4). This difference increased from 6-12 mo of age (759 vs 688 and 698 for AFS<sub>12.5</sub>, AFS<sub>14.0</sub> and AFS<sub>15.5</sub>, respectively;  $P < 0.01$ ; Table 4; Fig. 1B).

Table 3. Effects of feeding treatment on the growth and reproductive performance of heifers during the rearing period

|                                                        | Feeding Treatment  |                    |                    | Model <sup>1</sup>            |       | Significance levels <sup>2</sup> |
|--------------------------------------------------------|--------------------|--------------------|--------------------|-------------------------------|-------|----------------------------------|
|                                                        | SD1                | ID1                | ID2                | R <sup>2</sup> <sub>adj</sub> | RSE   |                                  |
| Number of heifers                                      | 74                 | 72                 | 29                 |                               |       |                                  |
| <b>Growth</b>                                          |                    |                    |                    |                               |       |                                  |
| BW <sup>3</sup> at birth (kg)                          | 41.2               | 41.7               | 41.1               | 0.00                          | 5.19  | 0.85                             |
| BW at first AI (kg)                                    | 400.7 <sup>a</sup> | 398.5 <sup>a</sup> | 378.1 <sup>b</sup> | 0.14                          | 33.29 | ★★                               |
| ADG <sup>4</sup> 0-6 months (g/d)                      | 958 <sup>a</sup>   | 976 <sup>a</sup>   | 1042 <sup>b</sup>  | 0.09                          | 97.7  | ★★★                              |
| ADG 6-12 months (g/d)                                  | 703 <sup>a</sup>   | 699 <sup>a</sup>   | 789 <sup>b</sup>   | 0.31                          | 116.8 | ★★                               |
| ADG 12-18 months (g/d)                                 | 800 <sup>a</sup>   | 774 <sup>a</sup>   | 660 <sup>b</sup>   | 0.11                          | 133.2 | ★★★                              |
| <b>Reproduction</b>                                    |                    |                    |                    |                               |       |                                  |
| Start of breeding season to first service interval (d) | 13.9               | 12.8               | 14.0               | 0.00                          | 5.76  | 0.46                             |
| Pregnancy rate at first service (%)                    | 64                 | 58                 | 66                 | NA                            | NA    | 0.64                             |
| Number of services                                     | 1.9                | 1.8                | 1.5                | 0.21                          | 0.78  | ●                                |
| Pregnant (%)                                           | 95                 | 96                 | 90                 | NA                            | NA    | 0.67                             |
| Age at first calving (months)                          | 24.0 <sup>a</sup>  | 23.9 <sup>a</sup>  | 21.9 <sup>b</sup>  | 0.32                          | 1.26  | ★★★                              |
| Calf BW (kg)                                           | 38.4               | 37.6               | 37.2               | 0.32                          | 4.02  | 0.37                             |

<sup>1</sup>adjusted coefficient of determination: R<sup>2</sup><sub>adj</sub>; residual standard error: RSE

<sup>2</sup>★★★ P < 0.001; ★★ P < 0.01; ★ P < 0.05; ● P < 0.1; otherwise, the exact P-value

<sup>3</sup>body weight: BW

<sup>4</sup>average Daily Gain: ADG

<sup>a-b</sup> Different superscripts indicate adjusted means that differ between feeding treatments (P < 0.05, Tukey's pairwise comparison)

321

322

323 From 12-18 mo of age, AFS<sub>12.5</sub> heifers had a lower growth rate than AFS<sub>14.0</sub> and AFS<sub>15.5</sub> heifers  
 324 ADG of 712 vs 799 and 790 g/d, respectively (P < 0.001; Table 4). This is consistent with the effects  
 325 of the feeding treatment and the distribution of animals among the AFS classes and feeding  
 326 treatments (Table 2).

327 AFS had no influence on fertility (Table 4). All heifers had a similar interval from the start of the  
 328 breeding season to the first service, a similar success at the first service and a similar pregnancy  
 329 rate by the end of the breeding season, with a similar number of services per animal.

330 No difference in calf BW (37.9 kg) was observed, despite a difference in the dam's BW at first  
 331 service and at first calving (AFS<sub>12.5</sub> heifers were lighter than those in AFS<sub>14.0</sub>, which were lighter than  
 332 those in AFS<sub>15.5</sub>, Tables 4 and 6). Consistent with the AFS, AFS<sub>12.5</sub> heifers calved younger than  
 333 AFS<sub>14.0</sub> heifers, which calved younger than AFS<sub>15.5</sub> heifers (Table 4).

334

Table 4. Relations between age at first service and growth and reproductive performance of heifers during the rearing period

|                                                        | Age at first service (AFS) |                     |                     | Model <sup>1</sup>            |       | Significance levels <sup>2</sup> |
|--------------------------------------------------------|----------------------------|---------------------|---------------------|-------------------------------|-------|----------------------------------|
|                                                        | AFS <sub>12.5</sub>        | AFS <sub>14.0</sub> | AFS <sub>15.5</sub> | R <sup>2</sup> <sub>adj</sub> | RSE   |                                  |
| Number of heifers                                      | 58                         | 57                  | 60                  |                               |       |                                  |
| <b>Growth</b>                                          |                            |                     |                     |                               |       |                                  |
| BW <sup>3</sup> at birth (kg)                          | 41.5                       | 42.0                | 40.2                | 0.02                          | 5.13  | 0.15                             |
| BW at first AI <sup>4</sup> (kg)                       | 373.1 <sup>a</sup>         | 394.3 <sup>b</sup>  | 419.8 <sup>c</sup>  | 0.37                          | 28.49 | ★★★                              |
| ADG <sup>5</sup> 0-6 months (g/d)                      | 1001                       | 960                 | 978                 | 0.03                          | 100.8 | ●                                |
| ADG 6-12 months (g/d)                                  | 759 <sup>a</sup>           | 688 <sup>b</sup>    | 698 <sup>b</sup>    | 0.30                          | 117.5 | ★★                               |
| ADG 12-18 months (g/d)                                 | 712 <sup>a</sup>           | 799 <sup>b</sup>    | 790 <sup>b</sup>    | 0.07                          | 136.3 | ★★                               |
| <b>Reproduction</b>                                    |                            |                     |                     |                               |       |                                  |
| Start of breeding season to first service interval (d) | 12.9                       | 13.2                | 14.3                | 0.00                          | 5.75  | 0.42                             |
| Pregnancy rate at first service (%)                    | 59                         | 60                  | 67                  | NA                            | NA    | 0.30                             |
| Number of services                                     | 1.7                        | 1.7                 | 1.9                 | 0.20                          | 0.78  | 0.25                             |
| Pregnant (%)                                           | 93                         | 91                  | 98                  | NA                            | NA    | 0.37                             |
| Age at first calving (months)                          | 22.3 <sup>a</sup>          | 23.8 <sup>b</sup>   | 24.8 <sup>c</sup>   | 0.52                          | 1.06  | ★★★                              |
| Calf body weight (kg)                                  | 37.4                       | 38.6                | 37.7                | 0.32                          | 4.02  | 0.31                             |

<sup>1</sup>adjusted coefficient of determination: R<sup>2</sup><sub>adj</sub>; residual standard error: RSE

<sup>2</sup>★★★ P < 0.001; ★★ P < 0.01; ★ P < 0.05; ● P < 0.1; otherwise, the exact P-value

<sup>3</sup>body weight: BW

<sup>4</sup>artificial insemination: IA

<sup>5</sup>average Daily Gain: ADG.

<sup>a-b</sup> Different superscripts indicate adjusted means that differ between feeding treatments (P < 0.05, Tukey's pairwise comparison)

335

### 336 **Lactating performance of primiparous cows**

337 BW recorded immediately after calving was lower for ID2 cows than for SD and ID1 cows (501 vs  
 338 542 and 534 kg, respectively; P < 0.001; Table 5; Fig. 2A.), which is consistent with the observation  
 339 that ID2 heifers first calved younger than SD and ID1 heifers (Table 4). No difference in BCS was  
 340 observed among the feeding treatments during the first lactation (result not shown). On a 308 d  
 341 basis, ID2 cows tended to produce less milk than SD and ID1 cows (6920 vs 7312 and 7370 kg,  
 342 respectively; P < 0.10; Table 5; Fig. 2C). No difference in mean fat and protein contents was  
 343 observed among feeding treatments. However, cows that received the ID2 treatment when heifers  
 344 produced less FPCM than cows that received the SD or ID1 treatments (6482 vs 6983 and 6973 kg,  
 345 respectively; P < 0.05). ID2 cows had a lower peak milk yield than SD and ID1 cows (28.7 vs 31.3  
 346 and 31.9 kg/d, respectively; P < 0.001). During the first seven weeks of lactation, ID2 cows were  
 347 lighter (on average, 38 and 25 kg less than SD and ID1 cows, respectively), and produced less milk  
 348 (3.1 kg/d less than SD and ID1). This difference decreased during the last part of the period (8-15  
 349 weeks); ID2 cows weighed 27 and 17 kg less than SD and ID1 cows, respectively, and produced  
 350 2.2 and 2.9 kg/d less milk than SD and ID1 cows, respectively.

351

Table 5. Effects of feeding treatment during the rearing period on productive and reproductive performances of primiparous cows

|                                         | Feeding Treatment |                   |                   | Model <sup>1</sup>            |       | Significance levels <sup>2</sup> |
|-----------------------------------------|-------------------|-------------------|-------------------|-------------------------------|-------|----------------------------------|
|                                         | SD1               | ID1               | ID2               | R <sup>2</sup> <sub>adj</sub> | RSE   |                                  |
| Number of cows                          | 67                | 68                | 24                |                               |       |                                  |
| <b>Production</b>                       |                   |                   |                   |                               |       |                                  |
| Total milk yield per 308 d (kg)         | 7312              | 7370              | 6920              | 0.19                          | 706.9 | ●                                |
| Peak milk yield (kg)                    | 31.3 <sup>a</sup> | 31.9 <sup>a</sup> | 28.7 <sup>b</sup> | 0.10                          | 3.50  | ★★                               |
| Mean fat content (g/kg)                 | 37.0              | 36.5              | 36.2              | 0.10                          | 3.66  | 0.75                             |
| Mean protein content (g/kg)             | 30.2              | 29.7              | 29.4              | 0.02                          | 1.53  | 0.17                             |
| Fat- and protein- corrected milk (kg)   | 6983 <sup>a</sup> | 6973 <sup>a</sup> | 6138 <sup>b</sup> | 0.26                          | 668.5 | ★                                |
| <b>Conformation</b>                     |                   |                   |                   |                               |       |                                  |
| BW <sup>3</sup> at first calving (kg)   | 542 <sup>a</sup>  | 534 <sup>a</sup>  | 501 <sup>b</sup>  | 0.10                          | 43.0  | ★★★                              |
| BCS <sup>4</sup> at calving (0-5 scale) | 2.45              | 2.40              | 2.30              | 0.33                          | 0.296 | 0.11                             |
| BCS at nadir (0-5 scale)                | 1.85              | 1.80              | 1.75              | 0.43                          | 0.267 | 0.47                             |
| BCS loss to nadir (0-5 scale)           | -0.55             | -0.60             | -0.60             | 0.44                          | 0.255 | 0.81                             |
| <b>Cyclicity<sup>5</sup></b>            |                   |                   |                   |                               |       |                                  |
| CLA (d)                                 | 20.9              | 24.8              | 20.1              | 0.00                          | 0.56  | 0.23                             |
| IOI <sub>1</sub>                        | 20.7              | 23.8              | 24.9              | 0.04                          | 14.01 | 0.47                             |
| LUT <sub>1</sub>                        | 13.3              | 13.9              | 14.9              | 0.18                          | 10.77 | 0.88                             |
| ILI <sub>1</sub>                        | 9.6               | 11.2              | 7.7               | 0.04                          | 11.29 | 0.55                             |
| IOI <sub>2-4</sub>                      | 23.3              | 23.6              | 21.2              | 0.00                          | 5.91  | 0.42                             |
| LUT <sub>2-4</sub>                      | 13.8              | 13.7              | 12.5              | 0.39                          | 5.79  | 0.77                             |
| ILI <sub>2-4</sub>                      | 9.0               | 10.2              | 9.0               | 0.45                          | 4.76  | 0.54                             |
| Normal (%)                              | 65%               | 59%               | 53%               | NA                            | NA    | 0.52                             |
| PLP (%)                                 | 19%               | 18%               | 33%               | NA                            | NA    | 0.44                             |
| Delayed (%)                             | 10%               | 12%               | 7%                | NA                            | NA    | 0.81                             |
| <b>Fertility</b>                        |                   |                   |                   |                               |       |                                  |
| Number of services per cow              | 1.9 <sup>a</sup>  | 2.4 <sup>b</sup>  | 2.2 <sup>ab</sup> | 0.10                          | 1.27  | ★                                |
| Pregnancy rate (%)                      | 86%               | 85%               | 87%               | NA                            | NA    | 0.92                             |
| Calf BW (kg)                            | 38.4              | 37.8              | 36.9              | 0.00                          | 4.84  | 0.40                             |

<sup>1</sup>adjusted coefficient of determination: R<sup>2</sup><sub>adj</sub>; residual standard error: RSE

<sup>2</sup>★★★ P < 0.001; ★★ P < 0.01; ★ P < 0.05; ● P < 0.1; otherwise, the exact P-value

<sup>3</sup>body weight: BW

<sup>4</sup>body condition score: BCS

<sup>5</sup>commencement of luteal activity: CLA; cycle length: IOI; luteal phase length : LUT; inter-luteal interval : ILI; prolonged luteal phase: PLP

<sup>a-b</sup> Different superscripts indicate adjusted means that differ between feeding treatments (P < 0.05, Tukey's pairwise comparison)

352

353 The feeding treatment of dairy cows during the rearing period did not affect ovarian cyclicity during  
 354 the first lactation (Table 5). Mean CLA was 20.4 d, and the first IOI was 20.7 d, with no difference in  
 355 LUT or ILI among treatments. No difference in the subsequent cycles was observed, with a mean  
 356 IOI of 23.3 d. The distribution of abnormal patterns of ovarian activity was not significant, although  
 357 ID2 cows had a lower normal profile rate than ID1 cows, which had a lower normal profile rate than  
 358 SD cows (53% vs 59% vs 65%, respectively; Table 5). ID2 cows had an incidence of PLP  
 359 abnormalities of 33%, while that for ID1 and SD cows was 18% and 19%, respectively (Table 5).

360 Ca. 86% of cows were pregnant at the end of the breeding season, which had no relationship with  
361 feeding treatment. Although the difference in cyclicity among feeding treatments did not influence  
362 the re-calving rate, ID1 cows required more services for pregnancy to occur than SD cows (2.4 vs  
363 1.9, respectively;  $P < 0.05$ ; Table 5). The number of services required to achieve pregnancy was ca.  
364 2.2 for ID2 cows. Feeding treatment had no influence on subsequent calf BW.  
365

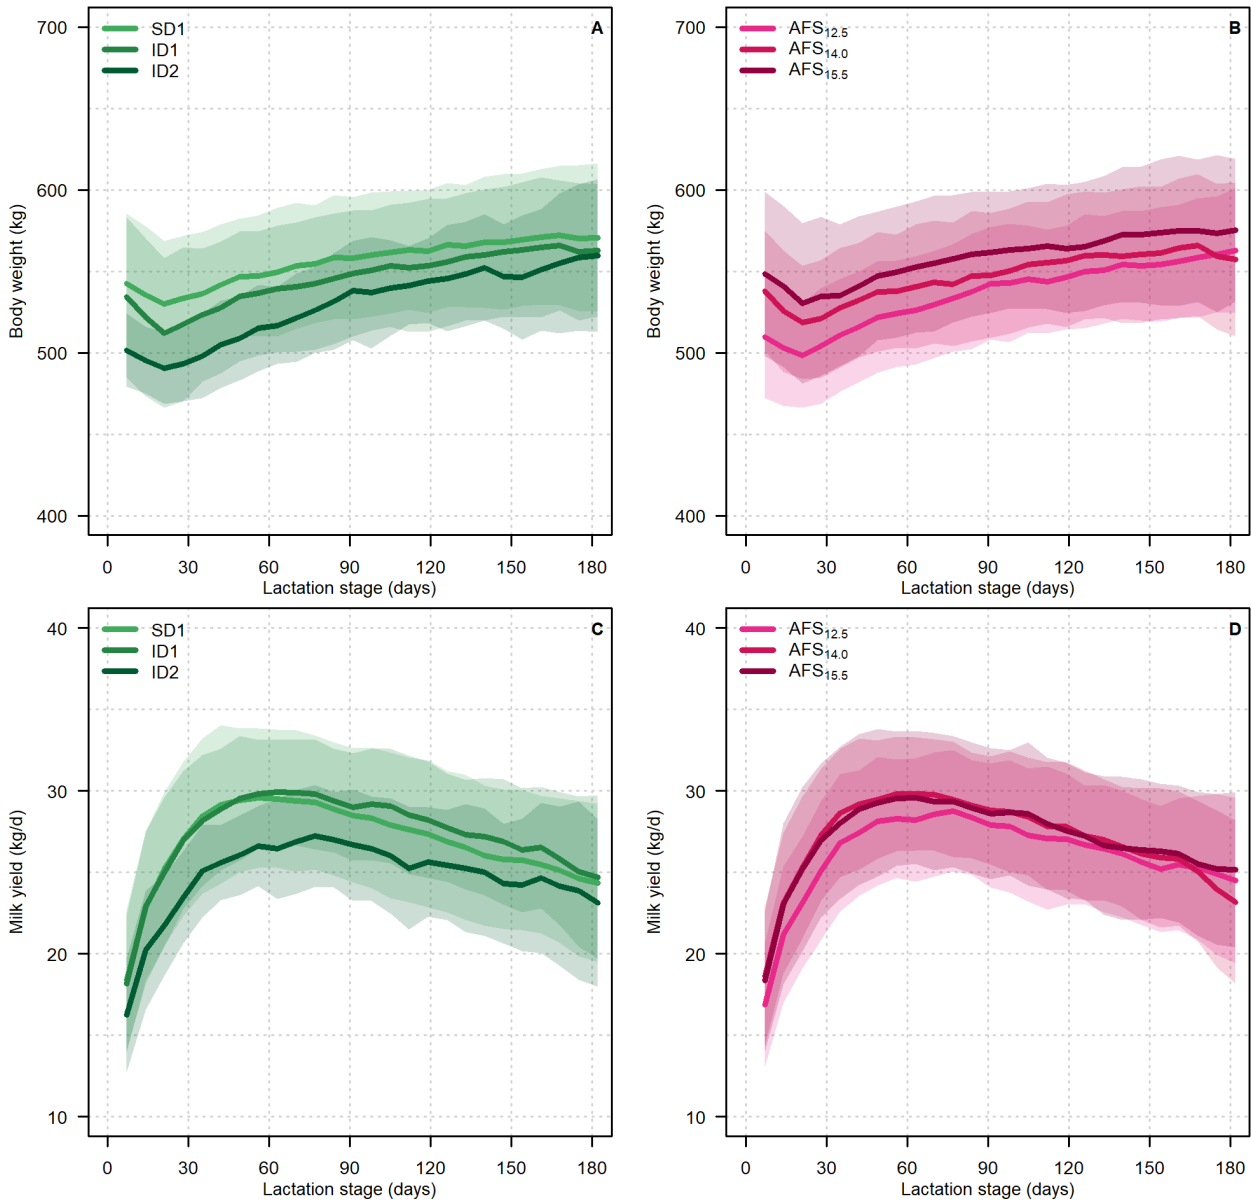

366  
367 Figure 2. (A and B) body weight and (C and D) milk yield of primiparous cows during lactation by (A and C)  
368 feeding treatment (SD, ID1, ID2: animals fed a standard (SD) or increased-plane (ID1 & ID2) feeding  
369 treatment) and (B and D) class of age at first service (AFS). Shaded areas are the dispersions of the data  
370 around the means ( $\pm$  one standard deviation).  
371

372

373 AFS influenced BW at calving, and was lower for AFS<sub>12.5</sub> than for AFS<sub>14.0</sub> and AFS<sub>15.5</sub> cows (509 vs  
 374 539 and 549 kg, respectively,  $P < 0.001$ ; Table 6; Fig. 2B). BCS at calving was higher for AFS<sub>15.5</sub>  
 375 than for AFS<sub>12.5</sub> and AFS<sub>14.0</sub> cows (2.45 vs 2.35 and 2.35, respectively;  $P < 0.05$ ). After calving, BCS  
 376 did not differ between AFS classes. On a 308 d basis, no difference in milk yield, composition or  
 377 FPCM was observed. Only peak milk yield tended to be lower for AFS<sub>12.5</sub> cows (30.2 kg) than for  
 378 AFS<sub>14.0</sub> and AFS<sub>15.5</sub> cows (31.6 and 31.7 kg, respectively; Fig. 2D; Table 6).  
 379

Table 6. Effects of the class of age at first service (AFS) on the productive and reproductive performance of primiparous cows

|                                         | Age at first service (AFS) |                     |                     | Model <sup>1</sup>            |       | Significance levels <sup>2</sup> |
|-----------------------------------------|----------------------------|---------------------|---------------------|-------------------------------|-------|----------------------------------|
|                                         | AFS <sub>12.5</sub>        | AFS <sub>14.0</sub> | AFS <sub>15.5</sub> | R <sup>2</sup> <sub>adj</sub> | RSE   |                                  |
| Number of cows                          | 51                         | 50                  | 58                  |                               |       |                                  |
| <b>Production</b>                       |                            |                     |                     |                               |       |                                  |
| Total milk yield per 308 d (kg)         | 7229                       | 7236                | 7370                | 0.15                          | 721.7 | 0.68                             |
| Peak milk yield (kg)                    | 30.2                       | 31.6                | 31.7                | 0.04                          | 3.59  | ●                                |
| Mean fat content (g/kg)                 | 36.2                       | 36.9                | 36.8                | 0.10                          | 3.65  | 0.66                             |
| Mean protein content (g/kg)             | 29.8                       | 29.9                | 29.9                | 0.00                          | 1.56  | 0.93                             |
| Fat- and protein- corrected milk (kg)   | 6800                       | 6891                | 7000                | 0.26                          | 688.4 | 0.51                             |
| <b>Conformation</b>                     |                            |                     |                     |                               |       |                                  |
| BW <sup>3</sup> at first calving (kg)   | 509 <sup>a</sup>           | 539 <sup>b</sup>    | 549 <sup>b</sup>    | 0.14                          | 41.9  | ★★★                              |
| BCS <sup>4</sup> at calving (0-5 scale) | 2.35 <sup>a</sup>          | 2.35 <sup>a</sup>   | 2.45 <sup>b</sup>   | 0.34                          | 0.295 | 0.05                             |
| BCS at nadir (0-5 scale)                | 1.75                       | 1.8                 | 1.85                | 0.44                          | 0.264 | 0.13                             |
| BCS loss to nadir (0-5 scale)           | -0.60                      | -0.60               | -0.55               | 0.44                          | 0.254 | 0.41                             |
| <b>Cyclicity<sup>5</sup></b>            |                            |                     |                     |                               |       |                                  |
| CLA (d)                                 | 20.2                       | 23.6                | 23.7                | 0.00                          | 0.56  | 0.39                             |
| IOI <sub>1</sub>                        | 25.0                       | 19.8                | 23.2                | 0.04                          | 13.96 | 0.31                             |
| LUT <sub>1</sub>                        | 13.9                       | 12.3                | 14.9                | 0.19                          | 10.73 | 0.57                             |
| ILI <sub>1</sub>                        | 10.7                       | 8.7                 | 10.7                | 0.04                          | 11.32 | 0.68                             |
| IOI <sub>2-4</sub>                      | 23.0                       | 22.3                | 24.1                | 0.00                          | 5.92  | 0.45                             |
| LUT <sub>2-4</sub>                      | 14.5                       | 13.6                | 12.7                | 0.39                          | 5.75  | 0.44                             |
| ILI <sub>2-4</sub>                      | 8.8                        | 8.8                 | 11.1                | 0.48                          | 4.67  | ●                                |
| Normal (%)                              | 58                         | 68                  | 56                  | NA                            | NA    | 0.55                             |
| PLP (%)                                 | 29                         | 8                   | 23                  | NA                            | NA    | ★                                |
| Delayed (%)                             | 5                          | 13                  | 14                  | NA                            | NA    | 0.23                             |
| <b>Fertility</b>                        |                            |                     |                     |                               |       |                                  |
| Number of services per cow              | 1.9                        | 2.4                 | 2.2                 | 0.08                          | 1.28  | 0.16                             |
| Pregnancy rate (%)                      | 86%                        | 88%                 | 84%                 | NA                            | NA    | 0.90                             |
| Calf BW (kg)                            | 37.2 <sup>a</sup>          | 39.3 <sup>b</sup>   | 37.3 <sup>a</sup>   | 0.04                          | 4.77  | ★                                |

<sup>1</sup>adjusted coefficient of determination: R<sup>2</sup><sub>adj</sub>; residual standard error: RSE

<sup>2</sup>★★★  $P < 0.001$ ; ★★  $P < 0.01$ ; ★  $P < 0.05$ ; ●  $P < 0.1$ ; otherwise, the exact  $P$ -value

<sup>3</sup>body weight: BW

<sup>4</sup>body condition score: BCS

<sup>5</sup>commencement of luteal activity: CLA; cycle length: IOI; luteal phase length : LUT; inter-luteal interval : ILI; prolonged luteal phase: PLP

<sup>a-b</sup> Different superscripts indicate adjusted means that differ between feeding treatments ( $P < 0.05$ , Tukey's pairwise comparison)

381 AFS influenced fertility characteristics little. For ovarian cyclicity, all three AFS classes had similar  
382 CLA, with similar cycle lengths, except for AFS<sub>15.5</sub> cows, which tended to have longer ILI from the  
383 second to fourth cycle than AFS<sub>12.5</sub> and AFS<sub>14.0</sub> cows (Table 6). AFS<sub>14.0</sub> cows had a lower incidence  
384 of PLP than AFS<sub>12.5</sub> and AFS<sub>15.5</sub> cows (8% vs 29% and 23%, respectively;  $P < 0.05$ ; Table 6). AFS  
385 did not influence fertility: all classes had similar number of services (2.2, on average), and an  
386 average of 86% of the cows in each class were pregnant at the end of the breeding season.  
387 Subsequent calf BW was heavier for AFS<sub>14.0</sub> cows than for AFS<sub>12.5</sub> and AFS<sub>15.5</sub> cows (+2 kg;  $P <$   
388 0.05; Table 6). Feed intake did not differ among feeding treatments or among AFS classes (17 kg  
389 DM/d), even when it was corrected per kg of BW (Fig. 3).

390  
391 Morphological trait analysis based on age at first calving (AFC) cohorts 2009-10 and 2010-11  
392 (Supplementary Fig.1) indicated that young cows at first calving (mean age of 21 mo,  $n = 30$ ; AFC<sub>21</sub>)  
393 were lighter than those that first calved at a mean age of 23.5 mo ( $n = 39$ ; AFC<sub>23.5</sub>) or 25 mo ( $n = 36$ ;  
394 AFC<sub>25</sub>; 498 vs 528 and 563 kg, respectively;  $P < 0.05$ ) and also had smaller morphological traits.  
395 For example, WH was 137.4, 139.1 and 140.4 cm for AFC<sub>21</sub>, AFC<sub>23.5</sub> and AFC<sub>25</sub>, respectively;  $P <$   
396 0.05). However, at a given age (e.g. 25 mo), no difference among the three AFC treatments was  
397 observed (140.7, 140.4 and 142.0 mm, respectively).

398

## 399 Discussion

400 The present study indicates that reducing the age of first service to ca. 12 mo and, consequently,  
401 age at first calving to 22 mo or less, influenced the performance of primiparous Holstein cows little.  
402 Several authors have shown that setting age at first calving of heifers at 23-26 mo of age increases  
403 longevity and maximises economic returns (Bach 2011; Wathes *et al.*, 2014; Boulton *et al.*, 2017).  
404 The early rearing period is key to reaching this target, as sub-optimal nutrition delays the onset of  
405 puberty, adversely affects skeletal growth and increases the risk of dystocia at first calving (Ettema  
406 and Santos 2004). Poor growth is the main reason for culling heifers prior to calving (Esslemont and  
407 Kossaibati 1997). Pre-weaning growth in dairy heifers is generally associated with the performance  
408 of first lactation (Khan *et al.* 2011; Soberon *et al.*, 2012). Some studies reported that pre-weaning  
409 differences caused by different feeding regimes were not statistically significant as calves aged  
410 (Morrison *et al.* 2009; Quigley *et al.* 2006). This may be explained in part by a compensatory  
411 increase in growth when the feed allowance (e.g. level, energy, protein) is no longer limited after a  
412 period of restriction.

413 The differences in feed allowance resulted in differences in development and size at 6 and 12 mo of  
414 age but had little effect on BW at weaning. In a study by Johnson *et al.* (2019), two treatment groups  
415 before weaning had significant differences in pre-weaning performance that persisted up to 6 mo. In  
416 our study, the high feed allowance before weaning, without restricting the TMR for control heifers,  
417 probably explains the lack of difference in BW observed at weaning. According to Morrison *et al.*



418

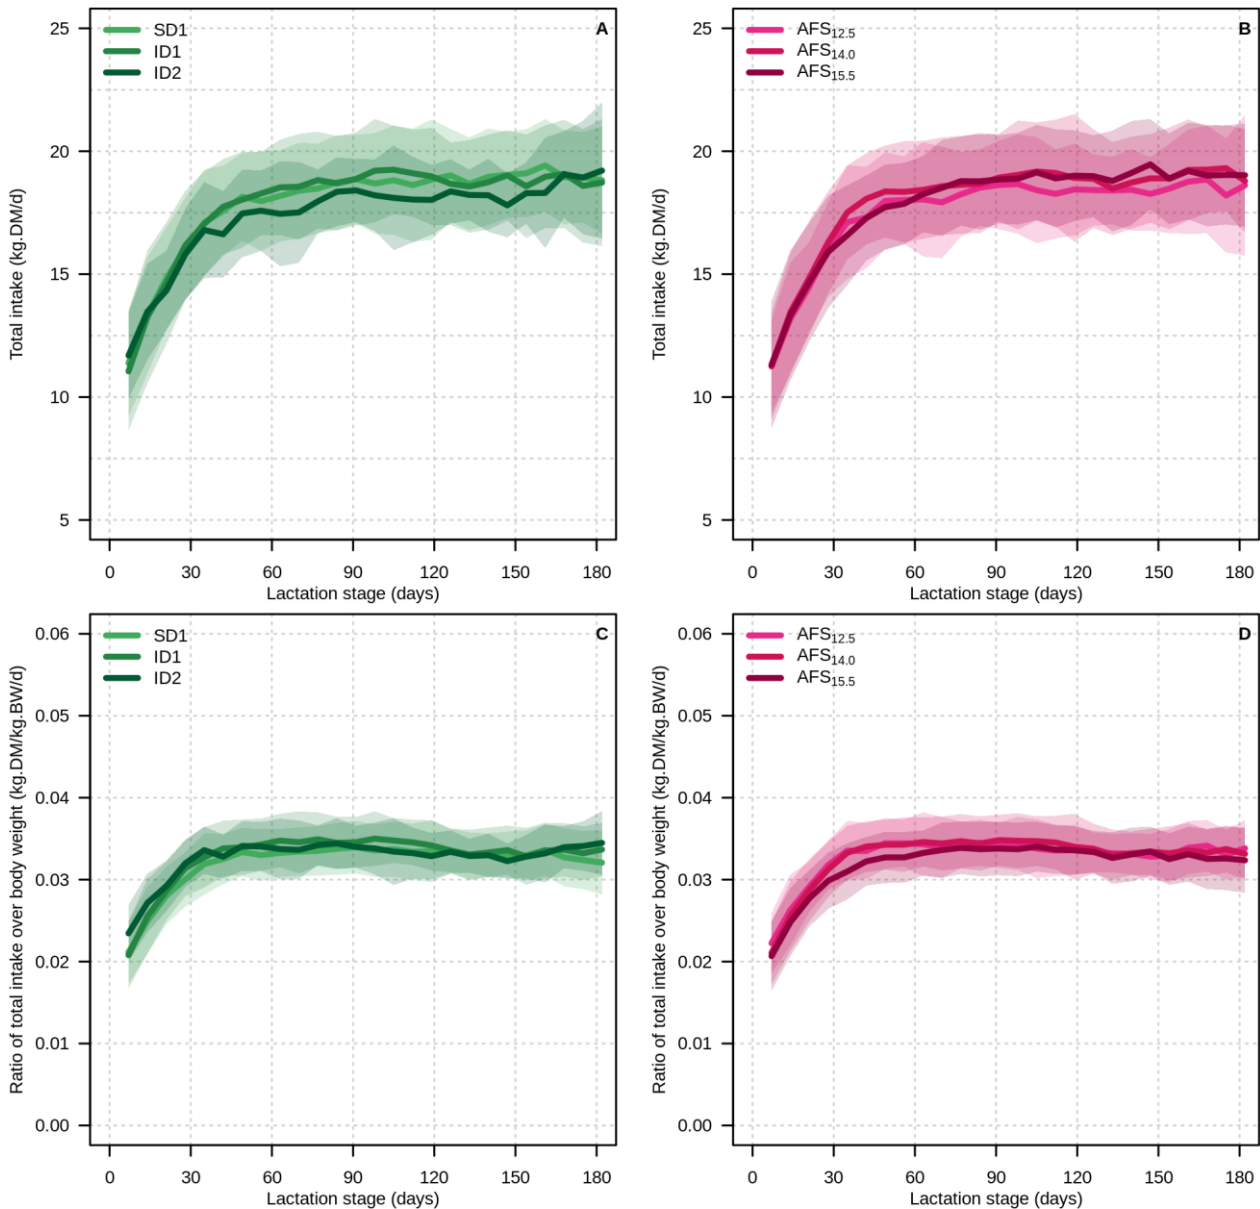

419

420 Figure 3. (A and B) daily dry matter intake and (C and D) daily ratio of dry matter intake over body weight of  
421 primiparous cows during lactation by (A and C) feeding treatment (SD, ID1, ID2: animals fed a standard (SD)  
422 or increased-plane (ID1 & ID2) feeding treatment) and (B and D) class of age at first service (AFS). Shaded  
423 areas are the dispersions of the data around the means ( $\pm$  one standard deviation).

424

425 (2009), on most commercial farms, a small amount of milk (4-6 L/day of whole milk or 400-600 g of  
426 milk replacer (MR) is offered until weaning at 42-56 days of age. According to Jasper and Weary  
427 (2002), *ad libitum* milk intake is ca. 12 L/day of whole milk, and intake in the present study was ca. 9  
428 L/d per heifer until 11 weeks of age. The development and BW of animals at 6 mo were high (e.g.  
429 111 cm HG and 220 kg BW), which fits well with recommendations for an optimal age at first calving  
430 at 24 mo of age or less. In a study by Ettema and Santos (2004) on the importance of age and BW  
431 at first calving for Holstein heifers, only 2.7% of dairy farms reached the recommended target BW,

432 which resulted in economic losses. Total nutrient intake, energy source and protein content in the  
433 diet have a cumulative effect on how calves partition nutrients into tissue (Van Amburgh and  
434 Drackley 2005). During the milking phase, calves benefit when MRs contain more protein and less  
435 fat, and reach higher levels of skeletal growth (Hill *et al.*, 2010). Therefore, providing more MR  
436 improves growth and feed efficiency (Bartlett *et al.*, 2006). Increased nutrient intake is also  
437 associated with increased plasma levels of insulin-like growth factor 1 (Smith *et al.*, 2002; Bartlett *et al.*,  
438 *et al.*, 2006), which in part regulates the subsequent growth rate (Hammon *et al.*, 2002; Brickell *et al.*,  
439 2009a).

440 Several studies discuss effects of intensive growth during rearing (Le Cozler *et al.* 2008), and that  
441 an increase in growth rate resulted in earlier puberty (Abeni *et al.*, 2019). However, authors do not  
442 agree on the influence of earlier calving on milk performance: some observed a negative influence,  
443 while others did not. Abeni *et al.* (2000) and Van Amburgh *et al.* (1998) concluded that calving  
444 earlier than 23 mo is associated with lower milk yields and lower milk fat content; however, it also  
445 results in a higher milk protein content. They also concluded that earlier calving results in a  
446 decrease in reproductive performance. In a more recent study, Krpáľková *et al.* (2014) observed  
447 that age at first calving had no influence on milk yields of primiparous cows, except for those during  
448 the first 100 d of lactation. They also observed the highest milk yield for the second and third  
449 lactation of heifers that first calved at 23 mo of age. In the present study, a negative influence was  
450 observed only at the start of the first lactation, but not for all of it. No data were available for later  
451 lactations. Van De Stroet *et al.* (2016) observed that primiparous cows that had consumed more  
452 starter feed as calves tended to have higher peak milk yields during first lactation than those that  
453 had consumed less. However, higher calf growth rates were not significantly related to future milk  
454 yield, but were related to higher BW of lactating cows and higher odds of surviving to first lactation.  
455 When lactation was corrected for BW, no difference in milk yield or composition was observed,  
456 regardless of the feeding strategy during the rearing period.

457 Decreasing the age of first calving is an effective way to decrease the length of the non-productive  
458 period during rearing. First calving at ca. 24 mo appears optimal for profitable production (Mourits *et al.*,  
459 *et al.*, 1999b; Ettema and Santos; 2004; Shamay *et al.*, 2005). In a meta-analysis of results of 100  
460 herds, Mohd Nor *et al.* (2013) estimated that heifers that first calved at 24 mo produced a mean of 7  
461 164 kg of milk per 305 d, and calving one mo earlier resulted in 143 kg less milk per 305 d. In the  
462 present study, younger heifers produced less milk during the first part of lactation, but the total milk  
463 yield per 305 d did not differ. The decrease in milk yield was similar (134 kg less per 305 d), albeit  
464 not significantly different, when age at first calving decreased from 24.8 to 23.8 mo of age.

465 Age at first service had no effect on fertility. In a previous study on puberty attainment in the 2011-  
466 12 cohort, we observed that most heifers reached puberty before oestrus synchronisation, at a  
467 mean age of  $10.3 \pm 2.2$  mo (6.2-14.4 mo) and a mean BW of  $296 \pm 40$  kg (224-369 kg; Abeni *et al.*,  
468 2019). ID2 heifers reached puberty one month earlier than SD and ID1 heifers. The onset of puberty

469 at 9-10 mo or less meant that 3 or 4 oestrous cycles occurred before insemination, which is  
470 generally consistent with acceptable fertility results in many domestic species (Lin *et al.*, 1986;  
471 Byerley *et al.*, 1987; Robinson, 1990; Le Cozler *et al.*, 1999). Regardless of calving strategy,  
472 decreasing the age of puberty and, consequently, the age of first service, is an effective way to  
473 shorten the non-productive period before calving. As Meyer *et al.* (2006) suggested, however, could  
474 reduce pre-pubertal mammary gland development by shortening the allometric phase of mammary  
475 gland growth and, in some cases, impair future milk production. Like its lack of effect on fertility in  
476 heifers, age at first calving did not influence fertility of primiparous cows during first lactation.  
477 Wathes *et al.* (2008) reported that fertility was optimised and maximum performance was  
478 maintained during first lactation when heifers first calved at 24-25 mo, although those that first  
479 calved at 22-23 mo had the best overall performance and longevity over 5 years, in partly because  
480 heifers with high fertility maintained high fertility as cows.

481 We also observed that at a similar feed allowance, early-calving heifers ate a similar amount of  
482 feed, produced less milk and ultimately were able to catch up in BW and development. As  
483 Krpalkova *et al.* (2014) reported, our results indicate that a feeding-rearing program that aims for  
484 first calving at less than 23 mo of age is a suitable option for successfully rearing Holstein heifers  
485 with optimal subsequent production and reproduction in a herd with suitable management.  
486 However, future studies are required to explore performances during the second and later  
487 lactations, as well as animal longevity.

488

## 489 **Acknowledgements**

490 The authors thank the technical staff of the INRA experimental farm of Méjusseaume for their  
491 commitment in taking care of the animals and making sure the experiment ran smoothly.

492

## 493 **Declaration of interest**

494 The authors declare that the research was conducted in the absence of commercial or financial  
495 relationships that could be construed as a potential conflict of interest.

496

## 497 **Ethics statement**

498 Experimental work was conducted in accordance with French national legislation on the use of  
499 animals for research. Protocol agreement no. 00944-02 was received from French Ethical  
500 Committee n0. 7.

501

## 502 **Software and data repository resources**

503 None of the data were deposited in an official repository.

504

## 505 **References**

- 506 Abeni F, Calamari L, Stefanini L, Pirlo G 2000. Effects of daily gain in pre-and postpubertal  
507 replacement dairy heifers on body condition score, body size, metabolic profile, and future  
508 milk production. *Journal of Dairy Science* 83, 1468–1478.
- 509 Abeni F, Petrera F, Le Cozler Y 2019. Effects of feeding treatment on growth rates, metabolic  
510 profiles, and age at puberty, and their relationships in dairy heifers. *Animal*, 13(5):1020-1029.
- 511 Agabriel J, Meschy F 2007. Alimentation des veaux et génisses d'élevage. In *Alimentation des*  
512 *bovins, ovins et caprins*. Editions Quae, Versailles, chapitre 4, pp 75-87.
- 513 Bach A, Ahedo J 2008. Record keeping and economics of dairy heifers. *Veterinary Clinics of North*  
514 *America Food Animal Practice*, 24, 117–138.
- 515 Bach A 2011. Associations between several aspects of heifer development and dairy cow  
516 survivability to second lactation. *Journal of Dairy Science*, 94, 1052–1057.
- 517 Bartlett KS, McKeith FK, Van de Haar MJ, Dahl GE, Drackley JK 2006. Growth and body  
518 composition of dairy calves fed milk replacers containing different amounts of protein at two  
519 feeding rates. *Journal of Animal Science*, 84, 1454–1467.
- 520 Bazin S, Augeard P, Carteau M, Champion H, Chilliard Y, Cuyille G, Disenhaus C, Durand G,  
521 Espinasse R, Gascoin A, Godineau M, Jouanne D, Ollivier O, Remond B 1984. Grille de notation  
522 de l'état d'engraissement des vaches pie-noires. Institut Technique de l'Élevage Bovin, Paris,  
523 France.
- 524 Boulton AC, Rushton J, Wathes DC 2017. An empirical analysis of the cost of rearing dairy heifers  
525 from birth to first calving and the time taken to repay these costs. *Animal*, 11, 1372–1380.
- 526 Brickell JS, McGowan MM, Wathes DC 2009. Effect of management factors and blood metabolites  
527 during the rearing period on growth of dairy heifers on UK farms. *Domestic Animal*  
528 *Endocrinology*, 36, 67-81.
- 529 Byerley DJ, Staigmiller RB, Berardinelli JG, Short RE 1987. Pregnancy rates of beef heifers bred  
530 either on pubertal or third oestrus. *Journal of Animal Science*, 65, 645–650.
- 531 Cutullic,E, Delaby L, Gallard Y, Disenhaus C 2011. Dairy cows' reproductive response to feeding  
532 level differs according to the reproductive stage and the breed, *Animal*, 5, 731-740.
- 533 Esslemont R, Kossaibati M 1997. The cost of respiratory diseases in dairy heifer calves. *The Bovine*  
534 *Practitioner* 33, 174–178.
- 535 Ettema JF, Santos EP 2004. Impact of age at calving on lactation, reproduction, health, and income  
536 in first-parity Holsteins on commercial farms. *Journal of Dairy Science* 87, 2730–2742.
- 537 Hammon HM, Schiessler G, Nussbaum A, Blum JW 2002. Feed Intake Patterns, Growth  
538 Performance, and Metabolic and Endocrine Traits in Calves Fed Unlimited Amounts of  
539 Colostrum and Milk by Automate, Starting in the Neonatal Period. *Journal of Dairy Science*,  
540 85, 3352–3362

- 541 Hill T M, Bateman HG, Aldrich JM, Schlotterbeck RL 2010. Effect of milk replacer program on  
542 digestion of nutrients in dairy calves. *Journal of Dairy Science*, 93, 1105–1115.
- 543 INRA 2007. Alimentation des bovins, ovins et caprins – besoins des animaux – Valeurs des  
544 aliments – Tables INRA 2007. Edition Quae, Versailles, France, 307 pages.
- 545 INRA, 2018. Alimentation des ruminants. Editions Quae, Versailles, France, 728 p.
- 546 Jasper J, Weary DM 2002. Effects of ad libitum milk intake on dairy calves. *Journal of Dairy*  
547 *Science*, 85, 3054–3058.
- 548 Johnson KF, Vinod Nair R, Wathes DC 2019. Comparison of the effects of high and low milk-  
549 replacer feeding regimens on health and growth of crossbred dairy heifers. *Animal Production*  
550 *Science*, 59, 1648–1659.
- 551 Khan MA, Weary DM, von Keyserlingk MAG 2011. *Invited review*: Effects of milk ration on solid feed  
552 intake, weaning, and performance in dairy heifers. *Journal of Dairy Science*, 94, 1071–1081.
- 553 Krpáľková L, Cabrera VE, Kvapilík J, Burdych J, Crump P 2014. Associations between age at first  
554 calving, rearing average daily weight gain, herd milk yield and dairy herd production,  
555 reproduction, and profitability. *Journal of Dairy Science*, 97, 6573–6582.
- 556 Le Cozler Y, Ringmar-Cederberg E, Johansen S, Dourmad JY, Neil M, Stern S, 1999. Effect of  
557 feeding level during rearing and mating strategy on performance of Swedish Yorkshire sows.  
558 1. Growth, puberty and conception rate. *Animal Science*, 68, 355–363.
- 559 Le Cozler Y, Lollivier V, Lacasse P, Disenhaus C 2008. Rearing strategy and optimizing first-calving  
560 targets in dairy heifers: a review. *Animal*, 2, 1393-1404.
- 561 Lin CY, McAllister AJ, Batra TR, Lee AJ, Roy GL, Vesely JA, Wauthy JM, Winter KA 1986.  
562 Production and reproduction of early and late bred dairy heifers. *Journal of Dairy Science*, 69,  
563 760–768.
- 564 Meyer MJ, Capuco AV, Ross DA, Lintault LM, Van Amburgh ME 2006. Development and nutritional  
565 regulation of the prepubertal heifer mammary gland: I. Parenchyma and fat pad mass and  
566 composition. *Journal of Dairy Science* 89, 4289–4297.
- 567 Mohd Nor N, Steeneveld W, van Werven T, Mourits MCM, Hogeveen H 2013. First-calving age and  
568 first-lactation milk production on Dutch dairy farms. *Journal of Dairy Science*, 96, 981–992.
- 569 Morrison SJ, Wicks HCF, Fallon RJ, Twigge J, Dawson LER, Wylie ARG, Carson AF 2009. Effects  
570 of feeding level and protein content of milk replacer on the performance of dairy herd  
571 replacements. *Animal*, 3, 1570–1579.
- 572 Mourits MCM, Huirne RBM, Dijkhuizen AA, Kristensen AR, Galligan DT 1999. Economic  
573 optimization of dairy heifer management decisions. *Agricultural Systems*, 61, 17–31.
- 574 Petersson KJ, Gustafsson H, Strandberg E, Berglund B 2006. Atypical progesterone profiles and  
575 fertility in Swedish dairy cows. *Journal of Dairy Science*, 89, 2529–2538.
- 576 Pirlo G, Capelletti M, Marchetto G 1997. Effects of energy and protein allowances in the diets of  
577 prepubertal heifers on growth and milk production. *Journal of Dairy Science*, 80, 730–739.

- 578 Quigley JD, Wolfe TA, Elsasser TH 2006. Effects of additional milk replacer feeding on calf health,  
579 growth, and selected blood metabolites in calves. *Journal of Dairy Science*, 89, 207–216.
- 580 Robinson JJ 1990. Nutrition in the reproduction of farm animals. *Nutrition Research Reviews*, 3,  
581 253–276.
- 582 R Core Team 2019. R: A Language and Environment for Statistical Computing. R Development  
583 Core Team, Vienna, Austria.
- 584 Shamay A, Homans R, Fuerman Y, Levin I, Barash H, Silanikove N, Mabjeesh SJ 2005. Expression  
585 of albumin in nonhepatic tissues and its synthesis by the bovine mammary gland. *Journal of*  
586 *Dairy Science*, 88, 569–576.
- 587 Smith JM, Van Amburgh ME, Diaz MC, Lucy MC, Bauman DE 2002. Effect of nutrient intake on the  
588 development of the somatotrophic axis and its responsiveness to GH in Holstein bull calves.  
589 *Journal of Animal Science*, 80, 1528–1537.
- 590 Soberon F, Raffrenato E, Everett RW, van Amburgh ME 2012. Preweaning milk replacer intake and  
591 effects on long-term productivity of dairy calves. *Journal of Dairy Science*, 95, 783–793.
- 592 Tozer PR 2000. Least-cost ration formulations for Holstein dairy heifers by using linear and  
593 stochastic programming. *Journal of Dairy Science* 83, 443–451.
- 594 Van Amburgh ME, Galton DM, Fox DG, Bauman DE, Chase LE, Erb HN, Everett RW 1998. Effects  
595 of three prepubertal body growth rates on performance of Holstein heifers during first  
596 lactation. *Journal of Dairy Science*, 81, 527–538.
- 597 Van Amburgh ME, Drackley J 2005. Current perspectives on the energy and protein requirements  
598 of the pre-weaned calf. Chapter 5 in *Calf and Heifer Rearing*. P.C. Garnsworthy, ed.  
599 Nottingham University Press, Nottingham, UK.
- 600 Van De Stroet DL, Calderón Díaz JA, Stalder KJ, Heinrichs AJ, Dechow CD, 2016. Association of  
601 calf growth traits with production characteristics in dairy cattle. *Journal of Dairy Science* 99,  
602 8347–8355.
- 603 Wathes DC, Brickell JS, Bourne NE, Swali A, Cheng Z 2008. Factors influencing heifer survival and  
604 fertility on commercial dairy farms. *Animal*, 2, 1135–1143.
- 605 Wathes DC, Pollott GE, Johnson KF, Richardson H, Cooke JS 2014. Heifer fertility and carry over  
606 consequences for lifetime production in dairy and beef cattle. *Animal* 8 (suppl. 1), 91–104.
